# 1 The Spatio-Temporal Control of Zygotic Genome Activation

2 George E. Gentsch,<sup>1,\*</sup> Nick D. L. Owens,<sup>2</sup> and James C. Smith<sup>1,3,\*</sup>

3 <sup>1</sup>Developmental Biology Laboratory, Francis Crick Institute, London, NW1 1AT, UK

4 <sup>2</sup>Department of Stem Cell and Developmental Biology, Pasteur Institute, 75015 Paris, France

5 <sup>3</sup>Lead Contact

6 \*Correspondence: [george.gentsch@crick.ac.uk](mailto:george.gentsch@crick.ac.uk) (G.E.G.) and [jim.smith@crick.ac.uk](mailto:jim.smith@crick.ac.uk) (J.C.S.)

## 7 SUMMARY

8 **One of the earliest and most significant events in embryonic development is zygotic**  
9 **genome activation (ZGA). In several species, bulk transcription begins at the mid-**  
10 **blastula transition (MBT) when, after a certain number of cleavages, the embryo attains**  
11 **a particular nuclear-to-cytoplasmic (N/C) ratio, maternal repressors become sufficiently**  
12 **diluted, and the cell cycle slows down. Here we resolve the frog ZGA in time and space**  
13 **by profiling RNA polymerase II (RNAPII) engagement and its transcriptional readout. We**  
14 **detect a gradual increase in both the quantity and the length of RNAPII elongation before**  
15 **the MBT, revealing that >1,000 zygotic genes disregard the N/C timer for their activation,**  
16 **and that the sizes of newly transcribed genes are not necessarily constrained by cell**  
17 **cycle duration. We also find that Wnt, Nodal and BMP signaling together generate most**  
18 **of the spatio-temporal dynamics of regional ZGA, directing the formation of orthogonal**  
19 **body axes and proportionate germ layers.**

## 20 INTRODUCTION

21 The genomes of multicellular organisms are transcriptionally silent at the time of fertilisation,  
22 and the events of early development, including zygotic (also known as embryonic) genome  
23 activation (ZGA), are directed by maternal gene products (De Iaco et al., 2019; Eckersley-  
24 Maslin et al., 2019; Gentsch et al., 2018b; Lee et al., 2013; Leichsenring et al., 2013; Liang et  
25 al., 2008). The number of cell cycles after which ZGA becomes essential for development (at  
26 which embryos arrest if transcription is inhibited) is highly reproducible within each species. In  
27 the zebrafish, the frog *Xenopus* and the fruit fly *Drosophila*, this occurs after 10, 12 and 13 cell  
28 cycles, respectively, at the so-called mid-blastula transition (MBT) (Blythe and Wieschaus,  
29 2015; Gentsch et al., 2018b; Kane and Kimmel, 1993; Newport and Kirschner, 1982a). Early  
30 development in these species occurs with no gain in cytoplasmic volume, and studies in  
31 *Xenopus* suggest that ZGA is triggered at a particular nuclear-to-cytoplasmic (N/C) ratio, when  
32 the increasing amount of nuclear DNA titrates out maternally deposited repressors (Newport

33 and Kirschner, 1982b). Slower-developing mammalian embryos show major waves of RNA  
34 polymerase II (RNAPII)-mediated transcription as early as the 2-cell stage in mice (Bolton et  
35 al., 1984; Hamatani et al., 2004) and 4- to 8-cell stage in humans (Braude et al., 1988; Vanessa  
36 et al., 2011). This occurs days before the formation of the blastocyst, which, like the blastula,  
37 contains the pluripotent cells that form the embryo proper.

38 In *Xenopus*, ZGA is associated with changes in cell behaviour after the MBT. First, rapid and  
39 nearly synchronous cell cleavages give way to longer and asynchronous cell divisions  
40 (Anderson et al., 2017; Newport and Kirschner, 1982a). Second, embryonic cells acquire the  
41 ability to respond to inductive signaling (Gentsch et al., 2018b), causing them to become motile,  
42 to establish dorso-ventral patterning, and to contribute to one or two of the three germ layers  
43 (endoderm, mesoderm and ectoderm). These germ layers emerge first during gastrulation and  
44 are the primordia of all organs. Third, embryos show accelerated degradation of maternal RNA,  
45 and fourth, cells gain apoptotic (Stack and Newport, 1997) and immunogenic (Gentsch et al.,  
46 2018a) capabilities.

47 While large-scale ZGA occurs at the MBT, some genes escape the repressive environment of  
48 the early embryo, and nascent transcripts can be detected in *Xenopus* during rapid cleavage  
49 stages. For example, primary microRNA transcripts of the polycistronic MIR-427 gene (Lund et  
50 al., 2009) are detectable in *X. tropicalis* after just three cell divisions (Owens et al., 2016). MIR-  
51 427, like its zebrafish equivalent MIR-430, is activated at early stages by the synergistic and  
52 pioneering activities of maternal members of the SoxB1 and Pou5F (Oct4) transcription factor  
53 (TF) families (Gentsch et al., 2018b; Heyn et al., 2014; Lee et al., 2013). These core  
54 pluripotency TFs, represented by Sox3 and Pou5f3 in *Xenopus*, are characterized by ubiquitous  
55 and high translation frequencies in pre-MBT embryos (Gentsch et al., 2018b; Lee et al., 2013).  
56 Zygotic transcription of the Nodal-encoding genes *nodal3/5/6*, and of the homeobox genes  
57 *siamois1/2*, is initiated by nuclear  $\beta$ -catenin as early as the 32-cell stage (Owens et al., 2016;  
58 Skirkanich et al., 2011; Yang et al., 2002).

59 While miR-427 (and miR-430 in zebrafish) contributes to the clearance of maternal RNA  
60 (Giraldez et al., 2006; Lund et al., 2009), *nodal* and *siamois* gene initiate the formation of the  
61 germ layers and body axes (Agius et al., 2000; Lemaire et al., 1995). All these genes, and other  
62 early-activated genes in *Drosophila*, *Xenopus* and zebrafish, have coding sequences of <1 kb  
63 and either no introns or just a few (Heyn et al., 2014). It has been suggested that the early rapid  
64 cell cycles cause DNA replication machinery to interfere with the transcription of larger genes  
65 (Shermoe and O'Farrell, 1991), a suggestion supported, to date, by the profiling of nascent  
66 transcripts (Heyn et al., 2014). We note, however, that the detection and temporal resolution of  
67 de novo transcription can be particularly challenging for genes that have both maternal and  
68 zygotic transcripts.

69 Here we use the continuous occupancy of RNAPII along gene bodies as a method to record  
70 ZGA. In contrast to transcript profiling techniques, this method (1) directly determines the

71 activity of every gene; (2) is independent of metabolic labeling (Heyn et al., 2014) and of any  
72 gene feature such as introns (Lee et al., 2013), single nucleotide polymorphisms (Harvey et al.,  
73 2013; Lott et al., 2011) or transcript half-lives; and (3) circumvents difficulties in detecting  
74 nascent transcripts in a large pool of maternal transcripts. By combining these data with the  
75 profiling of the transcriptome along the primary body axes (Blitz et al., 2017), we resolve ZGA  
76 in time and space for wild-type and various loss-of-function embryos. We provide evidence that  
77 runs counter to our original understanding of the cell cycle or of the N/C ratio in constraining  
78 gene expression before MBT. And finally, we show how signaling initiates and coordinates  
79 spatio-temporal ZGA in the *Xenopus* embryo.

## 80 RESULTS

### 81 RNAPII Profiling Reveals Exponential ZGA before MBT

82 In an effort to resolve the progression of ZGA, we profiled chromatin for RNAPII engagement  
83 on hand-sorted *X. tropicalis* embryos over six developmental stages from the 32-cell to the late  
84 gastrula stage (Figure 1A,B). RNAPII was localized on the genome by chromatin  
85 immunoprecipitation followed by deep sequencing (ChIP-Seq). We complemented RNAPII  
86 profiling with high time-resolution transcriptomics (Owens et al., 2016) counting both exonic  
87 and intronic RNA at 30-min intervals from fertilization to the late gastrula stage (Figures 1A,B  
88 and S1A,B). For both maternal and zygotic genes, the detection threshold was set to  $\geq 3$   
89 transcripts per million (TPM) averaged over any 1-h window during this developmental period  
90 to avoid genes with general low-level expression. This restricted the analysis to 13,042 genes  
91 (Figure 1B). These genes were considered active when we detected simultaneously RNAPII  
92 enrichment along their full length (see Transparent Methods) as well as the presence of the  
93 corresponding transcripts. In doing so, we used a low threshold of  $\geq 0.1$  TPM so as not to miss  
94 the onset of gene transcription. RNAPII-guided ZGA profiling was verified in part by active post-  
95 translational histone marks (Hontelez et al., 2015) and by differential expression methods  
96 aiming at detecting nascent transcripts. Thus, zygotic transcript depletion (by blocking RNAPII  
97 elongation with  $\alpha$ -amanitin) (Gentsch et al., 2018b) or enrichment (by selecting 4-thiouridine  
98 [4sU] tagged transcripts at the MBT and the mid-gastrula stage) showed substantial overlaps  
99 and positive correlations with RNAPII-covered genes (Figures 1A,B and S1C,D and Tables S1  
100 and S2).

101 This analysis revealed an exponential ZGA before the MBT with 27, 144 and 1,044 active genes  
102 after 5 (32-cell,  $\sim 2.5$  hpf), 7 (128-cell,  $\sim 3$  hpf) and 10 (1,024-cell,  $\sim 4$  hpf) cell cycles,  
103 respectively. Gene activation reached its peak at the MBT ( $\sim 4.5$  hpf), with 1,854 newly-  
104 activated genes, before dropping to 724 genes at the early-to-mid gastrula stage ( $\sim 7.5$  hpf) and  
105 increasing again to 1,214 genes towards the end of gastrulation ( $\sim 10$  hpf) (Figures 1B,C and  
106 S1E and Table S2). The dramatic increase in transcriptional activity that occurs in the 1.5 hours  
107 between the 128-cell stage and the MBT can be illustrated by Hilbert curves (Figure 1C), which

108 provide a genome-wide overview of RNAPII enrichment by folding chromosomes into two-  
109 dimensional space-filling and position-preserving plots (Gu et al., 2016). While most zygotic  
110 genes remain active beyond the mid-gastrula stage, 197 (including *siamois2* [*sia2*], *nodal5* and  
111 *znf470*) of the 4,836 zygotic genes (~4%) are deactivated within ~6 h of development (Figures  
112 1C and S1F,G). Slightly less than one third of the activated genes were differentially expressed  
113 along either or both of the animal-vegetal and dorso-ventral axes (Figures 1D and S1F).

114 The temporal order of enriched biological processes supported by ZGA matched the regulatory  
115 flow of gene expression, starting with nucleosome assembly, nucleic acid synthesis, mRNA  
116 metabolism and production, post-translational modification and degradation of proteins (Figure  
117 1E). The earliest transcriptional engagement, beginning at the 32 to 128-cell stages, was  
118 detected in gene clusters of tens to hundreds of kilobases (Figures 1A,C and S1H-J). These  
119 clusters featured close relatives of the same genes, some of which are critical to Nodal signaling  
120 (Nodal ligands), the formation of the Spemann organiser (Siamois homeobox transcription  
121 factors), nucleosome assembly (histones), mRNA decay (MIR-427), and ongoing gene  
122 regulation (zinc finger [ZF] transcription factors with on average 10 Cys2-His2 [C2H2] domains;  
123 Figure S1J). These earliest activated genes were shorter and encoded smaller proteins than  
124 those within the maternal pool or those that are activated post-MBT (Figures 1F and S1K). The  
125 non-coding features that contributed most to the differences in length were the 3' UTRs and  
126 introns (Figure S1K).

127 We noted that the shorter zygotic genes observed before the MBT did not correlate strictly with  
128 the time constraints imposed by short cell cycles. We detected increasing and wider spread of  
129 de novo recruitment of RNAPII before the MBT, when cleavages continue to occur at rapid and  
130 near-constant pace (Figures 1F and S1K). During this period, the median length of activated  
131 genes (and their coding sequences) increases from ~0.9 kb (~0.4 kb) to ~5.9 kb (~0.9 kb).  
132 However, it was not until after the MBT that the overall architecture of zygotic and maternal  
133 genes became indistinguishable (Figures 1F and S1K). Temporal comparison of RNAPII  
134 engagement and total RNA profiling suggested that the zygotic contribution to the transcriptome  
135 (as calculated by the number of zygotic genes divided by the number of genes with  $\geq 0.1$  TPM  
136 maternal transcripts averaged over the first hour post-fertilisation when the entire zygotic  
137 genome is still transcriptionally inactive) rose within seven cell cycles from ~0.2% at the 32-cell  
138 stage to ~22% at the MBT (Figure 1G). Further maternal degradation and more moderate  
139 transcriptional engagement extended the zygotic contribution to about one third of the  
140 transcriptome by the late gastrula stage. Maternal transcripts ( $\geq 0.1$  TPM, see above) were  
141 detected for ~67% of newly activated genes (18 out of 27 genes) at the 32-cell stage, ~85%  
142 (99/117) at the 128-cell stage, ~87% (780/900) at the 1,024-cell stage, ~95% (1,754/1,854) at  
143 the MBT, ~89% (644/724) at the mid-gastrula stage and ~90% (1,094/1,214) at the late gastrula  
144 stage (Table S2). Altogether ~91% (4,389/4,836) of newly activated genes have  $\geq 0.1$  TPM  
145 maternal contribution.

146 **Wnt, Nodal and BMP Signals Are Key Drivers of Regional ZGA**

147 We next sought to investigate the single and combined effects of different inductive signals on  
148 the spatio-temporal dynamics of ZGA. The early vertebrate embryo employs canonical Wnt,  
149 Nodal and BMP signals and their key transcriptional effectors  $\beta$ -catenin, Smad2 and Smad1,  
150 respectively, to establish the primary body axes and the three germ layers (reviewed by Arnold  
151 and Robertson, 2009 and Kimelman, 2006). In *Xenopus*,  $\beta$ -catenin first translocates to the  
152 nuclei of dorsal blastomeres at the 32-cell stage (Larabell et al., 1997; Schneider et al., 1996)  
153 (Figure 2A). After the MBT, zygotic Wnt8a causes more nuclear  $\beta$ -catenin to accumulate around  
154 the forming blastopore lip (Christian and Moon, 1993; Schohl and Fagotto, 2002). The nuclear  
155 translocation of Smad1 and Smad2 is triggered around the MBT by various BMP and Nodal  
156 ligands. Nuclear Smad1 is primarily detected on the ventral side and the blastocoel roof of the  
157 embryo while nuclear Smad2 is detected within the vegetal hemisphere (VH) and the marginal  
158 zone (MZ) (Faure et al., 2000; Schohl and Fagotto, 2002) (Figure 2A).

159 In an effort to inhibit canonical Wnt signaling, we injected into the *X. tropicalis* zygote a  
160 previously validated antisense morpholino oligonucleotide (MO) which interferes with  $\beta$ -catenin  
161 protein synthesis by annealing to the translation start codon (Heasman et al., 2000). Nodal and  
162 BMP signals were selectively blocked by incubating dejellied embryos from the 8-cell stage in  
163 the cell-permeable inhibitors SB431542 (Ho et al., 2006; Inman et al., 2002) and LDN193189  
164 (Cuny et al., 2008; Young et al., 2017), respectively. The morphological phenotypes of these  
165 single loss-of-function (LOF) treatments were consistent with previous observations and ranged  
166 from impaired axial elongation causing the loss of tail structures (BMP, Reversade et al., 2005)  
167 to severe gastrulation defects (Wnt, Heasman et al., 2000, and Nodal, Ho et al., 2006) as shown  
168 in Figure 2B. Briefly, Nodal LOF impaired blastopore lip formation and bulk tissue movements  
169 of gastrulation (bullet points in Figure 2B). However, it did not preclude subsequent elongation  
170 of the antero-posterior axis. By contrast, Wnt LOF embryos underwent gastrulation (albeit  
171 delayed and more circumferentially rather than in a dorsal to ventral wave), but failed to form  
172 an antero-posterior axis, with both head and tail being absent. With respect to the joint effects  
173 of Wnt, Nodal and BMP signaling, most dual and triple LOFs combined their individual  
174 morphological defects such that, for example, Wnt/Nodal LOF resulted in the complete loss of  
175 gastrulation and axial elongation. By contrast, Wnt/BMP LOF produced defects such as non-  
176 fusing neural folds (arrowheads in Figure 2B), structures that were either absent in Wnt LOF  
177 embryos or normal in BMP LOF embryos.

178 Changes to ZGA caused by the single or combined LOF of Wnt, Nodal and/or BMP were then  
179 determined at the late blastula stage on a transcriptome-wide scale using deep RNA  
180 sequencing (RNA-Seq). Analysis was limited to the 3,315 zygotic genes for which spatio-  
181 temporal expression data is available (Blitz et al., 2017; Owens et al., 2016) and where reduced  
182 expression ( $\geq 50\%$  loss of exonic and/or intronic transcript counts, FDR  $\leq 10\%$ ) could be  
183 detected in  $\alpha$ -amanitin-injected embryos (Figure 2C and Table S3) (Gentsch et al., 2018b).  $\alpha$ -  
184 Amanitin-mediated inhibition of RNAPII elongation impedes the morphogenetic tissue

185 movements of gastrulation and ultimately leads to early embryonic death (Gentsch et al.,  
186 2018b). Spatial gene expression patterns were inferred from experiments comparing the  
187 transcriptomes of embryos dissected along their animal-vegetal and dorso-ventral axes (Blitz  
188 et al., 2017); we did not include the left-right axis because there were no significant differences  
189 in gene expression across this axis at the gastrula stage (Blitz et al., 2017). The signal-mediated  
190 transcriptional effects (1.5-fold change from control RNA level) on zygotic genes, 86%  
191 (2840/3315) of which have  $\geq 0.1$  TPM maternal contribution, ranged from  $\sim 1.5\%$  ( $\sim 1.3\%$  down  
192 and  $\sim 0.2\%$  up) to  $\sim 26\%$  ( $\sim 19\%$  down and  $7\%$  up) for single BMP LOF and triple Wnt/Nodal/BMP  
193 LOFs, respectively (Figure 2C). As expected, the transcript levels of genes whose expression  
194 is solely zygotic were more strongly affected than those of zygotic genes with maternally  
195 contributed transcripts (Figures 2C and 4A). The extent of ZGA mis-regulation largely reflected  
196 the severity of the resulting morphological phenotypes at the late gastrula and the mid-tailbud  
197 stage (Figure 2B,C).

198 In comparison, the LOFs of critical maternal TFs like Pou5f3/Sox3 or VegT (Gentsch et al.,  
199 2018b) caused the mis-regulation of 61% ( $\sim 24\%$  down and  $\sim 37\%$  up) and 13% ( $\sim 6\%$  down and  
200  $\sim 7\%$  up) of zygotic genes, respectively. The LOFs of four zygotic T-box TFs (zVegT, Eomes,  
201 Tbx1 and Tbx2), all of which require Nodal signaling for their expression, caused slight mis-  
202 regulation in 19% ( $\sim 9\%$  down and  $\sim 10\%$  up) of the zygotic genes as detected over three  
203 consecutive developmental time points during gastrulation (Table S3). Among the ZGA-  
204 enriched biological functions (Figure 1D), Wnt, Nodal and BMP signals, like maternal  
205 Pou5f3/Sox3 and VegT, strongly affected zygotic genes associated with cell migration,  
206 gastrulation, dorso-ventral and antero-posterior body axis formation and regionalization (Figure  
207 2D). Impaired tissue movements during gastrulation, as observed in various LOFs (Figure 2B  
208 and Movie S1), was prefigured by a strong enrichment for cell migration-associated genes. The  
209 genes suppressed or unaffected by the selected signals and maternal TFs were enriched for  
210 the ZGA-critical biological processes of mRNA metabolism and translation. For instance, the  
211 transient activation of the entire zinc finger cluster (Figure S2A) was not affected by any tested  
212 LOF. Because family members are frequently cross-regulated, and the MBT-staged chromatin  
213 contains many Krüppel-like zinc finger 'footprints' (Gentsch et al., 2018b), it is conceivable that  
214 the unaffected, tissue-nonspecific part of ZGA is regulated by maternal zinc finger TFs. This  
215 vertebrate gene regulatory branch may be more ancient than that of Pou5F/SoxB1 as zinc  
216 finger TFs like Zelda are also key to ZGA of the invertebrate *Drosophila* (Liang et al., 2008).

217 Next, signal-dependent ZGA was resolved in time and space based on (i) the profiling of  
218 RNAPII-engaged chromatin from the 32-cell stage to the MBT and (ii) known gene expression  
219 patterns along the animal-vegetal and dorso-ventral axes (Blitz et al., 2017) (Figures 2E and  
220 S2B-F). In line with the nuclear translocation of their signal mediators (Figure 2A), Wnt, Nodal  
221 and BMP proved to be required for gene activation in different spatio-temporal domains of the  
222 early embryo:  $\beta$ -catenin was needed for  $\sim 87\%$  and  $\sim 46\%$  of genes preferentially expressed on  
223 the dorsal side and in the VH/MZ, respectively. Some of its target genes like *noda3.1* and *sia2*

224 were already active by the 32-cell stage (Figures 1C and 2E). Upon Wnt LOF, the early  
225 transcriptional down-regulation was followed by the mis-regulation of opposing cell fate  
226 specifiers: the upregulation of ventral genes (e.g., *id2*, *szl*) and the downregulation of dorsal  
227 genes (e.g., *chrd*, *otx2*). These observations suggest that  $\beta$ -catenin protects dorsal cells from  
228 ventralization (Figures 2E and S2C).

229 Along similar lines, Nodal LOF embryos predominantly displayed a down-regulation of dorsal  
230 (~63%) and VH/MZ-specific (~73%) genes, although there was no effect of Nodal LOF on the  
231 earliest-activated genes at the 32-cell stage or on opposing cell fate regulators (Figure S2A,B).  
232 Among the first genes to be sensitive to Nodal LOF was the MZ-specific FGF ligand *fgf20*,  
233 activated by the 128-cell stage (Figures 1C and S2A,B). By contrast, BMP LOF caused a  
234 decrease in ventrally-expressed gene expression (~45%) from the 1,024-cell stage onwards  
235 (Figure S2A,C).

236 As a comparison, the ubiquitous expression of maternal Pou5f3/Sox3 was required for  
237 transcription in all spatio-temporal domains, including, for example, the uniform expression of  
238 miR-427 (Figure S2A,D). The requirement for Pou5f3/Sox3 was more marked, however, for  
239 region-specific genes, in particular those expressed within animal- (~55%) and ventral-specific  
240 (~67%) domains (Figure S2A,D). The maternal TF VegT promoted vegetal identity by activating  
241 ~40% of genes transcriptionally enriched within its own expression domain, the vegetal  
242 hemisphere, while suppressing genes that are expressed in the animal hemisphere like *foxi4.2*.  
243 The requirement for VegT was similar in ventral- and dorsal-specific genes (~31% and ~30%  
244 respectively).

### 245 **Wnt/BMP Synergy Enables Uniform ZGA Across the Dorso-Ventral Axis**

246 The relationships between inductive signals with respect to spatial aspects of ZGA was  
247 explored by comparing zygotic transcriptomes in single and double LOF experiments.  
248 Interestingly, while simultaneous loss of both Nodal and BMP function, or both Nodal and Wnt,  
249 caused additive effects on gene expression compared to the single LOFs (Figures 3E and S3A-  
250 N), simultaneous loss of both BMP and Wnt signaling showed a more synergistic effect (Figure  
251 3A,F). These observations are consistent with the morphological consequences of single and  
252 double LOFs (Figure 2B). Single LOF experiments revealed very little overlap between Wnt  
253 and BMP gene targets (Figure 3B), a result consistent with their domains of activity which are,  
254 initially, at opposite ends of the dorso-ventral axis. However, dual Wnt/BMP inhibition increased  
255 the number of downregulated genes by 292, a rise of ~118% and ~664% with respect to  
256 individual Wnt- and BMP-dependent genes respectively (Figure 3B). Interestingly, this synergy  
257 affected 166 Nodal-dependent genes, most of which had uniform expression levels across the  
258 dorso-ventral axis (Figure 3C,D,F-H). Thus, spatially-restricted Wnt, BMP and Nodal signals  
259 act together to establish dorso-ventral expression uniformity of genes such as *tbxt* and *eomes*  
260 (Figure 3I).

261

262 Overall, the loss of canonical Wnt, Nodal and/or BMP signaling caused the misregulation of  
263 ~39% (~22.1% down, ~2.1% down/up and ~14.4% up) of genes activated at ZGA (Figure 4A).  
264 These signals were required for most regional ZGA on the dorsal side (~89%) and in the VH  
265 and MZ (~82%). Notably, their input affected virtually all genes (~98%, 56/57) with enriched  
266 expression in the dorso-vegetal/MZ quadrant (Figure 4B,C). Thus, Wnt, Nodal and BMP  
267 substantially contribute to regional ZGA in most anatomical domains of the early gastrula  
268 embryo with the exception of animally enriched transcription (~19%). Animal- and ventral-  
269 specific gene expression relies strongly on both activation by ubiquitous maternal TFs (e.g.  
270 Pou5f3/Sox3) and on repression by signals (Figure 4B,D) and other maternal TFs (e.g. VegT)  
271 on the opposite side (Figure S2F).

## 272 **DISCUSSION**

273 Our study provides two major insights into the mechanisms by which ZGA is initiated in time  
274 and space in *Xenopus tropicalis*. The first concerns the temporal aspects, where we find that  
275 RNAPII can be detected across gene bodies well before the MBT, during the period when rapid  
276 synchronous cell divisions divide the zygote into 4,096 blastomeres (Figure 4E). The average  
277 length of genes covered by RNAPII grows during this time, from ~1 kb at the 32-cell stage to  
278 ~6 kb at the 1,024-cell stage; these figures compare with an average size of ~16 kb for  
279 maternally-expressed genes and for genes expressed after the MBT. Recent long-read  
280 sequencing of the zebrafish transcriptome at pre-MBT stages identified transcripts as long as  
281 8 kb spanning multiple pri-miR-430 elements (Nudelman et al., 2018). Furthermore, RNAPII  
282 elongation in pre-MBT *Drosophila* embryos occurred at rates of 2.4 to 3.0 kb/min (Chen et al.,  
283 2013; Fukaya et al., 2017).

284 We do not know why RNAPII, despite its high abundance and its ability to promote rapid  
285 elongation, is restricted at early stages from transcribing more genes and longer genes. It may,  
286 perhaps, be a consequence of the gradual nature of the chromatin remodeling that occurs  
287 during these stages, from the accessibility of *cis*-regulatory elements (Gentsch et al., 2018b;  
288 Liu et al., 2018; Lu et al., 2016; Wu et al., 2016) to the spatial organisation of an initially  
289 unstructured or highly variable chromatin landscape (Du et al., 2017; Flyamer et al., 2017; Hug  
290 et al., 2017; Kaaij et al., 2018; Ke et al., 2017). Whatever the reason, the increase of elongated  
291 RNAPII engagement between the 128-cell stage and the MBT indicates that a significant  
292 component of ZGA disregards the N/C ratio which was originally thought to underlie the onset  
293 of transcription at the MBT (Newport and Kirschner, 1982b). Similar conclusions have been  
294 drawn from profiling the zygotic transcriptome of haploid *Drosophila* (Lu et al., 2009) and cell  
295 cycle-arrested zebrafish (Chan et al., 2018). Thus, it is becoming clear from work in flies, fish  
296 and frogs that ZGA starts before the MBT and accelerates thereafter (Ali-Murthy et al., 2013;  
297 Collart et al., 2014; Mathavan et al., 2005; Owens et al., 2017; Tan et al., 2013), reaching a  
298 peak at the MBT (reviewed by Jukam et al., 2017 and Langley et al., 2014).



299 These observations notwithstanding, it remains possible that cell cycles do contribute to the  
300 temporal progression of ZGA and the exponential increase in the number of activated genes  
301 before the MBT. In particular, cell cycles may accelerate chromatin remodeling by displacing  
302 suppressors in mitotic chromatin and providing unique access to TFs (Halley-Stott et al., 2014)  
303 and structural proteins of high-order chromatin (Ke et al., 2017). For example, maternal core  
304 histones have been shown to prevent premature ZGA by competing with specific TFs (Joseph  
305 et al., 2017).

306 In addition to the small sizes of the earliest activated genes, we observed that most of these  
307 genes, which have no or few introns, code for groups of related factors like histones or zinc  
308 finger TFs, and that they appear as clusters spanning up to several hundred kilobases. This is  
309 in line with previous findings of the earliest active multicopy and intron-poor genes like miR-427  
310 and *nodal5/6* in *Xenopus* embryos (Collart et al., 2014; Lund et al., 2009; Owens et al., 2016;  
311 Skirkanich et al., 2011; Takahashi et al., 2006; Yanai et al., 2011; Yang et al. 2002) and miR-  
312 430 in zebrafish and Medaka fish (Giraldez et al., 2005; Heyn et al., 2014; Tani et al., 2010).  
313 The number and spatial proximity of clustered genes enhances transcriptional output by  
314 allowing the sharing of multiple cis-regulatory elements (arranged as super-enhancers) (Whyte  
315 et al., 2013) and by fortifying transcriptional condensates of TFs, coactivators and RNAPII  
316 (Boija et al., 2018; Cho et al., 2018; Chong et al., 2018; Sabari et al., 2018; Shrinivas et al.,  
317 2018). Overall, based on enriched gene functions, we discovered that ZGA exerts a temporal  
318 control of gene expression from nucleosome remodeling before the MBT to protein degradation  
319 after the MBT.

320 Our second insight concerns spatial ZGA, and the observation that we can assign a large  
321 proportion of spatio-temporal ZGA to key signaling pathways (reviewed by Arnold and  
322 Robertson, 2009 and Kimelman, 2006). Canonical Wnt, Nodal and BMP signaling govern  
323 regional ZGA in line with the nuclear translocation of their signal mediators (Faure et al., 2000;  
324 Larabell et al., 1997; Schohl and Fagotto, 2002). Thus, Nodal signaling predominantly affects  
325 transcription within the vegetal hemisphere and marginal zone, while Wnt and BMP initiate  
326 transcription in dorsal and ventral regions, respectively. The timing of regional ZGA is defined  
327 by the sequential translocation of signal mediators such that nuclear  $\beta$ -catenin directs regional  
328 ZGA at the 32-cell stage, followed by nuclear Smad2 at the 128-cell stage and Smad1 at the  
329 1,024-cell stage. While Smad2-mediated signal transduction depends on the zygotic  
330 transcription of its six Nodal ligands (Faure et al., 2000; Gentsch et al., 2018b; Jones et al.,  
331 1995; Yang et al., 2002), canonical Wnt and BMP signaling are initiated by the maternally  
332 inherited ligands Wnt11 and BMP2/4/7, respectively (Faure et al., 2000; Heasman, 2006; Tao  
333 et al., 2005).

334 We also show that the synergy of opposing signals of the Wnt and BMP pathway affects many  
335 Nodal-dependent genes with uniform expression along the dorso-ventral axis such as *eomes*  
336 and *Brachyury* (*tbxt*). It is not yet clear whether Wnt/BMP synergy arises from joint chromatin

337 engagement or from mutual or post-translational interactions. For instance, Wnt8a signal can  
338 enhance BMP transcriptional readouts by inhibiting the phosphorylation of GSK3, which  
339 normally targets Smad1 for degradation (Funtealba et al., 2007). However, the analysis of  
340 *Brachyury* gene regulation in zebrafish suggests that Wnt and BMP can be integrated at a  
341 single cis-regulatory DNA element and together with a separate Nodal-responsive DNA  
342 element they can establish uniform dorso-ventral expression (Harvey et al., 2010). This is  
343 further corroborated by our analysis of genome-wide chromatin engagement (Gentsch et al.,  
344 2018b): the canonical DNA recognition motif for the Wnt-associated basic helix-span-helix  
345 (bHSH) TF AP-2 was more enriched at Smad1 than Smad2 binding sites (Figure S3O).

346 We therefore propose that Wnt, BMP and Nodal signal mediators are critical to regional ZGA  
347 and that they balance initially opposing cell fate commitments. However, we have previously  
348 shown that signal integration also relies on maternal pioneer TFs like Pou5f3 and Sox3 to make  
349 signal-responsive cis-regulatory elements accessible for signal mediator binding. For example,  
350 Nodal-induced transcription of the *Brachyury* gene depends on the pioneering roles of maternal  
351 Pou5f3 and Sox3, and less on their transcriptional activities (Gentsch et al., 2018b).

352 Overall, we demonstrate that the temporal and spatial dynamics of regional ZGA are regulated  
353 by the sequential and spatially restricted translocation of Wnt, Nodal and BMP signal mediators.  
354 These events establish the formation of the primary body axes and germ layers of the embryo.  
355 Temporal RNAPII profiling indicates that >1,000 genes of increasing length are activated before  
356 MBT and that this substantial portion of ZGA is independent of both the classic N/C ratio and  
357 of cell cycle lengthening.

## 358 **LIMITATIONS OF THE STUDY**

359 We detected a dramatic increase in genome-wide recruitment of RNAPII over the cleavage  
360 stages during which the genome begins to be transcribed. We used within-sample  
361 normalization to scale developmental stage-specific RNAPII profiles. However, because of the  
362 large differences in total RNAPII enrichment between samples, chromatin spike-ins are now  
363 considered a more accurate method to normalize ChIP-Seq profiles across consecutive  
364 developmental stages (Chen et al., 2016). We combined separate whole-embryo  
365 determinations of RNAPII engagement and transcript levels to reveal the temporal dynamics of  
366 ZGA. This approach could be improved by profiling RNAPII-associated RNA to directly couple  
367 RNAPII elongation with transcript accumulation (e.g., Churchman and Weissman, 2011). In  
368 addition, the spatial resolution of ZGA, which is based on transcriptomics of dissected  
369 embryonic parts in our study, could be enhanced by various deep single-cell profiling and super-  
370 resolution imaging technologies. We show that most regional ZGA depends on Wnt, Nodal and  
371 BMP signals, but an important question remains: How are these signals integrated at the  
372 chromatin level to sustain RNAPII-mediated transcript elongation? In part, this could be

373 investigated by targeted genome editing to increase our understanding of signal-responsive  
374 gene regulatory DNA.

## 375 **ACKNOWLEDGEMENTS**

376 We thank Abdul Sesay, Leena Bhaw, Harsha Jani, Deborah Jackson and Meena Anissi for  
377 deep sequencing; Mareike Thompson for critical reading of the manuscript; and the Smith lab  
378 for discussions and advice. G.E.G and J.C.S. were supported by the Medical Research Council  
379 (program number U117597140) and are now supported by the Francis Crick Institute, which  
380 receives its core funding from Cancer Research UK (FC001-157), the UK Medical Research  
381 Council (FC001-157), and the Wellcome Trust (FC001-157).

## 382 **AUTHOR CONTRIBUTIONS**

383 Conceptualization, G.E.G.; Methodology, G.E.G.; Computational Code, G.E.G.; Formal  
384 Analysis, G.E.G. and N.D.L.O.; Investigation, G.E.G.; Writing – Original Draft, G.E.G. and  
385 J.C.S.; Writing – Review & Editing, G.E.G and J.C.S.; Funding Acquisition, J.C.S.

## 386 **DECLARATION OF INTERESTS**

387 The authors declare no competing interests.

## 388 **REFERENCES**

- 389 Agius, E., Oelgeschlager, M., Wessely, O., Kemp, C., and De Robertis, E.M. (2000).  
390 Endodermal Nodal-related signals and mesoderm induction in *Xenopus*. *Development* *127*,  
391 1173–1183.
- 392 Ali-Murthy, Z., Lott, S.E., Eisen, M.B., and Kornberg, T.B. (2013). An essential role for zygotic  
393 expression in the pre-cellular *Drosophila* embryo. *PLoS Genet.* *9*, e1003428.
- 394 Anderson, G.A., Gelens, L., Baker, J.C., and Ferrell, J.E. (2017). Desynchronizing Embryonic  
395 Cell Division Waves Reveals the Robustness of *Xenopus laevis* Development. *Cell Rep.* *21*,  
396 37–46.
- 397 Arnold, S.J., and Robertson, E.J. (2009). Making a commitment: cell lineage allocation and  
398 axis patterning in the early mouse embryo. *Nat. Rev. Mol. Cell Biol.* *10*, 91–103.
- 399 Boija, A., Klein, I.A., Sabari, B.R., Dall'Agnese, A., Coffey, E.L., Zamudio, A.V., Li, C.H.,  
400 Shrinivas, K., Manteiga, J.C., Hannett, N.M., et al. (2018). Transcription Factors Activate  
401 Genes through the Phase-Separation Capacity of Their Activation Domains. *Cell* *175*, 1842–  
402 1855.e16.
- 403 Blitz, I.L., Paraiso, K.D., Patrushev, I., Chiu, W.T.Y., Cho, K.W.Y., and Gilchrist, M.J. (2017).  
404 A catalog of *Xenopus tropicalis* transcription factors and their regional expression in the early  
405 gastrula stage embryo. *Dev. Biol.* *426*, 409–417.

- 406 Blythe, S.A., and Wieschaus, E.F. (2015). Zygotic genome activation triggers the DNA  
407 replication checkpoint at the midblastula transition. *Cell* 160, 1169–1181.
- 408 Bolton, V.N., Oades, P.J., and Johnson, M.H. (1984). The relationship between cleavage,  
409 DNA replication, and gene expression in the mouse 2-cell embryo. *J. Embryol. Exp. Morph.*  
410 79, 139–163.
- 411 Braude, P., Bolton, V., and Moore, S. (1988). Human gene expression first occurs between  
412 the four- and eight-cell stages of preimplantation development. *Nature* 332, 459–461.
- 413 Chan, S.H., Tang, Y., Miao, L., Darwich-Codore, H., Vejnar, C.E., Beaudoin, J.-D., Musaev,  
414 D., Fernandez, J.P., Moreno-Mateos, M.A., and Giraldez, A.J. (2018). Brd4 and P300  
415 regulate zygotic genome activation through histone acetylation. bioRxiv 369231. DOI:  
416 <https://doi.org/10.1101/369231>
- 417 Chen, K., Hu, Z., Xia, Z., Zhao, D., Li, W., and Tyler, J.K. (2015). The Overlooked Fact:  
418 Fundamental Need for Spike-In Control for Virtually All Genome-Wide Analyses. *Mol. Cell.*  
419 *Biol.* 36, 662–667.
- 420 Chen, K., Johnston, J., Shao, W., Meier, S., Staber, C., and Zeitlinger, J. (2013). A global  
421 change in RNA polymerase II pausing during the *Drosophila* midblastula transition. *Elife* 2,  
422 e00861.
- 423 Chiu, W.T., Le, R.C., Blitz, I.L., Fish, M.B., Li, Y., Biesinger, J., Xie, X., and Cho, K.W.Y.  
424 (2014). Genome-wide view of TGF $\beta$ /Foxh1 regulation of the early mesendoderm program.  
425 *Development* 141, 1–114.
- 426 Cho, W.-K., Spille, J.-H., Hecht, M., Lee, C., Li, C., Grube, V., and Cisse, I.I. (2018). Mediator  
427 and RNA polymerase II clusters associate in transcription-dependent condensates. *Science*  
428 361, 412–415.
- 429 Chong, S., Dugast-Darzacq, C., Liu, Z., Dong, P., Dailey, G.M., Cattoglio, C., Heckert, A.,  
430 Banala, S., Lavis, L., Darzacq, X., et al. (2018). Imaging dynamic and selective low-  
431 complexity domain interactions that control gene transcription. *Science* 361, eaar2555.
- 432 Christian, J.L., and Moon, R.T. (1993). Interactions between Xwnt-8 and Spemann organizer  
433 signaling pathways generate dorsoventral pattern in the embryonic mesoderm of *Xenopus*.  
434 *Genes Dev.* 7, 13–28.
- 435 Collart, C., Owens, N.D.L., Bhaw-Rosun, L., Cooper, B., De Domenico, E., Patrushev, I.,  
436 Sesay, A.K., Smith, J.N., Smith, J.C., and Gilchrist, M.J. (2014). High-resolution analysis of  
437 gene activity during the *Xenopus* mid-blastula transition. *Development* 141, 1927–1939.
- 438 Cuny, G.D., Yu, P.B., Laha, J.K., Xing, X., Liu, J.-F., Lai, C.S., Deng, D.Y., Sachidanandan,  
439 C., Bloch, K.D., and Peterson, R.T. (2008). Structure-activity relationship study of bone  
440 morphogenetic protein (BMP) signaling inhibitors. *Bioorg. Med. Chem. Lett.* 18, 4388–4392.
- 441 De Iaco, A., Coudray, A., Duc, J., and Trono, D. (2019). DPPA2 and DPPA4 are necessary to  
442 establish a 2C-like state in mouse embryonic stem cells. *EMBO Reports* e47382.
- 443 Du, Z., Zheng, H., Huang, B., Ma, R., Wu, J., Zhang, X., He, J., Xiang, Y., Wang, Q., Li, Y., et  
444 al. (2017). Allelic reprogramming of 3D chromatin architecture during early mammalian  
445 development. *Nature* 547, 232–235.
- 446 Eckersley-Maslin, M., Alda-Catalinas, C., Blotenburg, M., Kreibich, E., Krueger, C., and Reik,  
447 W. (2019). Dppa2 and Dppa4 directly regulate the Dux-driven zygotic transcriptional program.  
448 *Genes Dev.* 33, 194–208.
- 449 Faure, S., Lee, M.A., Keller, T., Dijke, ten, P., and Whitman, M. (2000). Endogenous patterns  
450 of TGF $\beta$  superfamily signaling during early *Xenopus* development. *Development* 127,

- 451 2917–2931.
- 452 Flyamer, I.M., Gassler, J., Imakaev, M., Brandão, H.B., Ulianov, S.V., Abdennur, N., Razin,  
453 S.V., Mirny, L.A., and Tachibana-Konwalski, K. (2017). Single-nucleus Hi-C reveals unique  
454 chromatin reorganization at oocyte-to-zygote transition. *Nature* 544, 110–114.
- 455 Fuentealba, L.C., Eivers, E., Ikeda, A., Hurtado, C., Kuroda, H., Pera, E.M., and De Robertis,  
456 E.M. (2007). Integrating patterning signals: Wnt/GSK3 regulates the duration of the  
457 BMP/Smad1 signal. *Cell* 131, 980–993.
- 458 Fukaya, T., Lim, B., and Levine, M. (2017). Rapid Rates of Pol II Elongation in the *Drosophila*  
459 Embryo. *Curr. Biol.* 27, 1387–1391.
- 460 Gentsch, G.E., Spruce, T., Monteiro, R.S., Owens, N.D.L., Martin, S.R., and Smith, J.C.  
461 (2018a). Innate Immune Response and Off-Target Mis-splicing Are Common Morpholino-  
462 Induced Side Effects in *Xenopus*. *Dev. Cell* 44, 597–610.e10.
- 463 Gentsch, G.E., Spruce, T., Owens, N.D.L., and Smith, J.C. (2018b). The role of maternal  
464 pioneer factors in predefining first zygotic responses to inductive signals. bioRxiv 306803.  
465 DOI: <https://doi.org/10.1101/306803>
- 466 Giraldez, A.J., Cinalli, R.M., Glasner, M.E., Enright, A.J., Thomson, J.M., Baskerville, S.,  
467 Hammond, S.M., Bartel, D.P., and Schier, A.F. (2005). MicroRNAs regulate brain  
468 morphogenesis in zebrafish. *Science* 308, 833–838.
- 469 Giraldez, A.J., Mishima, Y., Rihel, J., Grocock, R.J., Van Dongen, S., Inoue, K., Enright, A.J.,  
470 and Schier, A.F. (2006). Zebrafish MiR-430 promotes deadenylation and clearance of  
471 maternal mRNAs. *Science* 312, 75–79.
- 472 Gu, Z., Eils, R., and Schlesner, M. (2016). HilbertCurve: an R/Bioconductor package for high-  
473 resolution visualization of genomic data. *Bioinformatics* 32, 2372–2374.
- 474 Halley-Stott, R.P., Jullien, J., Pasque, V., and Gurdon, J. (2014). Mitosis gives a brief window  
475 of opportunity for a change in gene transcription. *PLoS Biol.* 12, e1001914.
- 476 Hamatani, T., Carter, M.G., Sharov, A.A., and Ko, M.S.H. (2004). Dynamics of global gene  
477 expression changes during mouse preimplantation development. *Dev. Cell* 6, 117–131.
- 478 Harvey, S.A., Sealy, I., Kettleborough, R., Fenyes, F., White, R., Stemple, D., and Smith, J.C.  
479 (2013). Identification of the zebrafish maternal and paternal transcriptomes. *Development*  
480 140, 2703–2710.
- 481 Harvey, S.A., Tümpel, S., Dubrulle, J., Schier, A.F., and Smith, J.C. (2010). no tail integrates  
482 two modes of mesoderm induction. *Development* 137, 1127–1135.
- 483 Heasman, J. (2006). Patterning the early *Xenopus* embryo. *Development* 133, 1205–1217.
- 484 Heasman, J., Kofron, M., and Wylie, C. (2000).  $\beta$ Catenin Signaling Activity Dissected in the  
485 Early *Xenopus* Embryo: A Novel Antisense Approach. *Dev. Biol.* 222, 124–134.
- 486 Heyn, P., Kircher, M., Dahl, A., Kelso, J., Tomancak, P., Kalinka, A.T., and Neugebauer, K.M.  
487 (2014). The earliest transcribed zygotic genes are short, newly evolved, and different across  
488 species. *Cell Rep.* 6, 285–292.
- 489 Ho, D.M., Chan, J., Bayliss, P., and Whitman, M. (2006). Inhibitor-resistant type I receptors  
490 reveal specific requirements for TGF-beta signaling in vivo. *Dev. Biol.* 295, 730–742.
- 491 Hontelez, S., van Kruijsbergen, I., Georgiou, G., van Heeringen, S.J., Bogdanović, O., Lister,  
492 R., and Veenstra, G.J.C. (2015). Embryonic transcription is controlled by maternally defined

- 493 chromatin state. *Nat. Commun.* 6, 10148.
- 494 Hug, C.B., Grimaldi, A.G., Kruse, K., and Vaquerizas, J.M. (2017). Chromatin Architecture  
495 Emerges during Zygotic Genome Activation Independent of Transcription. *Cell* 169, 216–  
496 228.e219.
- 497 Inman, G.J., Nicolás, F.J., Callahan, J.F., Harling, J.D., Gaster, L.M., Reith, A.D., Laping,  
498 N.J., and Hill, C.S. (2002). SB-431542 is a potent and specific inhibitor of transforming growth  
499 factor-beta superfamily type I activin receptor-like kinase (ALK) receptors ALK4, ALK5, and  
500 ALK7. *Mol. Pharmacol.* 62, 65–74.
- 501 Jones, C.M., Kuehn, M.R., Hogan, B.L., Smith, J.C., and Wright, C.V. (1995). Nodal-related  
502 signals induce axial mesoderm and dorsalize mesoderm during gastrulation. *Development*  
503 121, 3651–3662.
- 504 Joseph, S.R., Pálffy, M., Hilbert, L., Kumar, M., Karschau, J., Zaburdaev, V., Shevchenko, A.,  
505 and Vastenhouw, N.L. (2017). Competition between histone and transcription factor binding  
506 regulates the onset of transcription in zebrafish embryos. *Elife* 6, e23326.
- 507 Jukam, D., Shariati, S.A.M., and Skotheim, J.M. (2017). Zygotic Genome Activation in  
508 Vertebrates. *Dev. Cell* 42, 316–332.
- 509 Kaaij, L.J.T., van der Weide, R.H., Ketting, R.F., and de Wit, E. (2018). Systemic Loss and  
510 Gain of Chromatin Architecture throughout Zebrafish Development. *Cell Rep.* 24, 1–10.e4.
- 511 Kane, D.A., and Kimmel, C.B. (1993). The zebrafish midblastula transition. *Development* 119,  
512 447–456.
- 513 Ke, Y., Xu, Y., Chen, X., Feng, S., Liu, Z., Sun, Y., Yao, X., Li, F., Zhu, W., Gao, L., et al.  
514 (2017). 3D Chromatin Structures of Mature Gametes and Structural Reprogramming during  
515 Mammalian Embryogenesis. *Cell* 170, 367–381.e20.
- 516 Kimelman, D. (2006). Mesoderm induction: from caps to chips. *Nat. Rev. Genet.* 7, 360–372.
- 517 Langley, A.R., Smith, J.C., Stemple, D.L., and Harvey, S.A. (2014). New insights into the  
518 maternal to zygotic transition. *Development* 141, 3834–3841.
- 519 Larabell, C.A., Torres, M., Rowing, B.A., Yost, C., Miller, J.R., Wu, M., Kimelman, D., and  
520 Moon, R.T. (1997). Establishment of the dorso-ventral axis in *Xenopus* embryos is presaged  
521 by early asymmetries in beta-catenin that are modulated by the Wnt signaling pathway. *J. Cell*  
522 *Biol.* 136, 1123–1136.
- 523 Lemaire, P., Garrett, N., and Gurdon, J.B. (1995). Expression cloning of *Siamois*, a *Xenopus*  
524 homeobox gene expressed in dorsal-vegetal cells of blastulae and able to induce a complete  
525 secondary axis. *Cell* 81, 85–94.
- 526 Lee, M.T., Bonneau, A.R., Takacs, C.M., Bazzini, A.A., Divito, K.R., Fleming, E.S., and  
527 Giraldez, A.J. (2013). *Nanog*, *Pou5f1* and *SoxB1* activate zygotic gene expression during the  
528 maternal-to-zygotic transition. *Nature* 503, 360–364.
- 529 Leichsenring, M., Maes, J., Mössner, R., Driever, W., and Onichtchouk, D. (2013). *Pou5f1*  
530 transcription factor controls zygotic gene activation in vertebrates. *Science* 341, 1005–1009.
- 531 Liang, H.-L., Nien, C.-Y., Liu, H.-Y., Metzstein, M.M., Kirov, N., and Rushlow, C. (2008). The  
532 zinc-finger protein *Zelda* is a key activator of the early zygotic genome in *Drosophila*. *Nature*  
533 456, 400–403.
- 534 Liu, G., Wang, W., Hu, S., Wang, X., and Zhang, Y. (2018). Inherited DNA methylation primes  
535 the establishment of accessible chromatin during genome activation. *Genome Res.* 28, 998–  
536 1007.

- 537 Lott, S.E., Villalta, J.E., Schroth, G.P., Luo, S., Tonkin, L.A., and Eisen, M.B. (2011).  
538 Noncanonical compensation of zygotic X transcription in early *Drosophila melanogaster*  
539 development revealed through single-embryo RNA-seq. *PLoS Biol.* 9, e1000590.
- 540 Lu, F., Liu, Y., Inoue, A., Suzuki, T., Zhao, K., and Zhang, Y. (2016). Establishing Chromatin  
541 Regulatory Landscape during Mouse Preimplantation Development. *Cell* 165, 1375–1388.
- 542 Lu, X., Li, J.M., Elemento, O., Tavazoie, S., and Wieschaus, E.F. (2009). Coupling of zygotic  
543 transcription to mitotic control at the *Drosophila* mid-blastula transition. *Development* 136,  
544 2101–2110.
- 545 Lund, E., Liu, M., Hartley, R.S., Sheets, M.D., and Dahlberg, J.E. (2009). Deadenylation of  
546 maternal mRNAs mediated by miR-427 in *Xenopus laevis* embryos. *RNA* 15, 2351–2363.
- 547 Mathavan, S., Lee, S.G.P., Mak, A., Miller, L.D., Murthy, K.R.K., Govindarajan, K.R., Tong,  
548 Y., Wu, Y.L., Lam, S.H., Yang, H., et al. (2005). Transcriptome analysis of zebrafish  
549 embryogenesis using microarrays. *PLoS Genet.* 1, 260–276.
- 550 Newport, J., and Kirschner, M.W. (1982a). A major developmental transition in early *xenopus*  
551 embryos: I. characterization and timing of cellular changes at the midblastula stage. *Cell* 30,  
552 675–686.
- 553 Newport, J., and Kirschner, M.W. (1982b). A major developmental transition in early *xenopus*  
554 embryos: II. control of the onset of transcription. *Cell* 30, 687–696.
- 555 Nudelman, G., Frasca, A., Kent, B., Sadler, K.C., Sealton, S.C., Walsh, M.J., and Zaslavsky,  
556 E. (2018). High resolution annotation of zebrafish transcriptome using long-read sequencing.  
557 *Genome Res.* 28, 1415-1425.
- 558 Owens, N.D.L., Blitz, I.L., Lane, M.A., Patrushev, I., Overton, J.D., Gilchrist, M.J., Cho,  
559 K.W.Y., and Khokha, M.K. (2016). Measuring Absolute RNA Copy Numbers at High Temporal  
560 Resolution Reveals Transcriptome Kinetics in Development. *Cell Rep.* 14, 632–647.
- 561 Reversade, B., Kuroda, H., Lee, H., Mays, A., and De Robertis, E.M. (2005). Depletion of  
562 *Bmp2*, *Bmp4*, *Bmp7* and Spemann organizer signals induces massive brain formation in  
563 *Xenopus* embryos. *Development* 132, 3381–3392.
- 564 Sabari, B.R., Dall'Agnese, A., Boija, A., Klein, I.A., Coffey, E.L., Shrinivas, K., Abraham, B.J.,  
565 Hannett, N.M., Zamudio, A.V., Manteiga, J.C., et al. (2018). Coactivator condensation at  
566 super-enhancers links phase separation and gene control. *Science* 361, eaar3958.
- 567 Schneider, S., Steinbeisser, H., Warga, R., and Hausen, P. (1996). Beta-catenin translocation  
568 into nuclei demarcates the dorsalizing centers in frog and fish embryos. *Mech. Dev.* 57, 191–  
569 198.
- 570 Schohl, A., and Fagotto, F. (2002). Beta-catenin, MAPK and Smad signaling during early  
571 *Xenopus* development. *Development* 129, 37–52.
- 572 Shermoen, A.W., and O'Farrell, P.H. (1991). Progression of the cell cycle through mitosis  
573 leads to abortion of nascent transcripts. *Cell* 67, 303–310.
- 574 Shrinivas, K., Sabari, B.R., Coffey, E.L., Klein, I.A., Boija, A., Zamudio, A.V., Schuijers, J.,  
575 Hannett, N.M., Sharp, P.A., Young, R.A., et al. (2018). Enhancer features that drive formation  
576 of transcriptional condensates. bioRxiv 495606. DOI: <https://doi.org/10.1101/495606>
- 577 Skirkanich, J., Luxardi, G., Yang, J., Kodjabachian, L., and Klein, P.S. (2011). An essential  
578 role for transcription before the MBT in *Xenopus laevis*. *Dev. Biol.* 357, 478–491.
- 579 Stack, J.H., and Newport, J.W. (1997). Developmentally regulated activation of apoptosis  
580 early in *Xenopus* gastrulation results in cyclin A degradation during interphase of the cell

- 581 cycle. *Development* 124, 3185–3195.
- 582 Takahashi, S., Onuma, Y., Yokota, C., Westmoreland, J.J., Asashima, M., and Wright, C.V.E.  
583 (2006). Nodal-related gene *Xnr5* is amplified in the *Xenopus* genome. *Genesis* 44, 309–321.
- 584 Tan, M.H., Au, K.F., Yablonovitch, A.L., Wills, A.E., Chuang, J., Baker, J.C., Wong, W.H., and  
585 Li, J.B. (2013). RNA sequencing reveals a diverse and dynamic repertoire of the *Xenopus*  
586 *tropicalis* transcriptome over development. *Genome Res.* 23, 201–216.
- 587 Tani, S., Kusakabe, R., Naruse, K., Sakamoto, H., and Inoue, K. (2010). Genomic  
588 organization and embryonic expression of miR-430 in medaka (*Oryzias latipes*): insights into  
589 the post-transcriptional gene regulation in early development. *Gene* 449, 41–49.
- 590 Tao, Q., Yokota, C., Puck, H., Kofron, M., Birsoy, B., Yan, D., Asashima, M., Wylie, C.C., Lin,  
591 X., and Heasman, J. (2005). Maternal *wnt11* activates the canonical *wnt* signaling pathway  
592 required for axis formation in *Xenopus* embryos. *Cell* 120, 857–871.
- 593 Vassena, R., Boué, S., González-Roca, E., Aran, B., Auer, H., Veiga, A., and Izpisúa  
594 Belmonte, J.C. (2011). Waves of early transcriptional activation and pluripotency program  
595 initiation during human preimplantation development. *Development* 138, 3699–3709.
- 596 Whyte, W.A., Orlando, D.A., Hnisz, D., Abraham, B.J., Lin, C.Y., Kagey, M.H., Rahl, P.B.,  
597 Lee, T.I., and Young, R.A. (2013). Master transcription factors and mediator establish super-  
598 enhancers at key cell identity genes. *Cell* 153, 307–319.
- 599 Wu, J., Huang, B., Chen, H., Yin, Q., Liu, Y., Xiang, Y., Zhang, B., Liu, B., Wang, Q., Xia, W.,  
600 et al. (2016). The landscape of accessible chromatin in mammalian preimplantation embryos.  
601 *Nature* 534, 652–657.
- 602 Yanai, I., Peshkin, L., Jorgensen, P., and Kirschner, M.W. (2011). Mapping gene expression  
603 in two *Xenopus* species: evolutionary constraints and developmental flexibility. *Dev. Cell* 20,  
604 483–496.
- 605 Yang, J., Tan, C., Darken, R.S., Wilson, P.A., and Klein, P.S. (2002). Beta-catenin/Tcf-  
606 regulated transcription prior to the midblastula transition. *Development* 129, 5743–5752.
- 607 Young, J.J., Kjolby, R.A.S., Wu, G., Wong, D., Hsu, S.-W., and Harland, R.M. (2017). Noggin  
608 is required for first pharyngeal arch differentiation in the frog *Xenopus tropicalis*. *Dev. Biol.*  
609 426, 245–254.



610 **MAIN FIGURES**

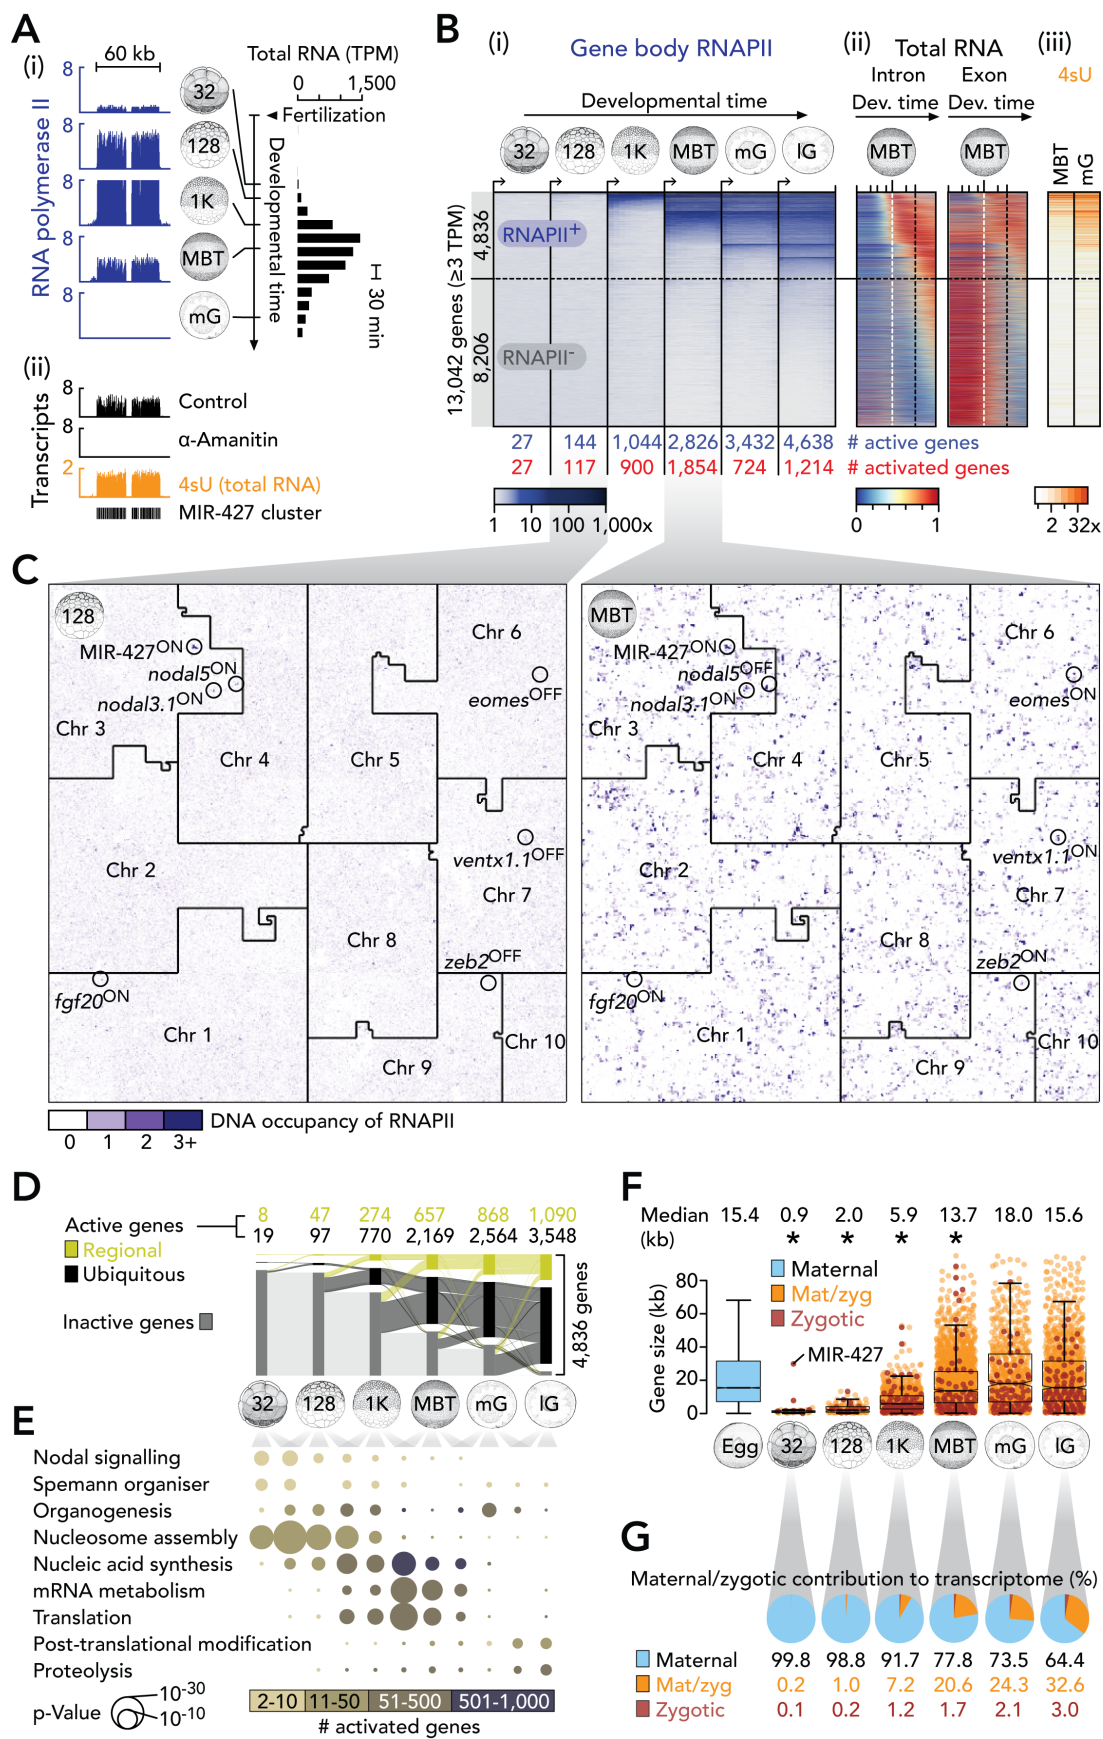

611 **Figure 1. Dynamics and Architecture of ZGA in *X. tropicalis***

613 (A) (i) Genome-wide profiling of RNAPII and total RNA (Owens et al., 2016) to determine  
614 temporal ZGA dynamics. (ii) Complementary approach to detect transcriptionally active genes  
615 by  $\alpha$ -amanitin-induced loss and 4sU-enrichment of nascent (zygotic) transcripts.

616 (B) Progression of ZGA from the 32-cell to the late gastrula stage based on (i) whole gene body  
617 (full-length) occupancy of RNAPII (i.e., RNAPII was enriched across entire gene bodies; see  
618 Transparent Methods). Co-aligned: (ii) High time-resolution of total RNA, separated by intron-  
619 and exon-derived signals, from fertilization to the late gastrula stage, and (iii) enrichments of  
620 4sU-tagged RNA at the MBT and the mid-gastrula stage. Numbers below RNAPII heat map  
621 represent counts of active (blue) and activated (red) genes at the indicated developmental  
622 stages. The horizontal dotted line separates RNAPII-engaged (RNAPII<sup>+</sup>) from non-engaged  
623 (RNAPII<sup>-</sup>) genes as detected until the late gastrula stage. The vertical dotted lines in the total  
624 RNA plots indicate the developmental time points of the MBT (white) and the late gastrula stage  
625 (black), respectively.

626 (C) 2D space-filling (Hilbert) curves showing RNAPII recruitment to chromosomes (Chr) at the  
627 128-cell stage and the MBT. A few zygotic genes are highlighted as being active (ON) or not  
628 (OFF) based on their engagement with RNAPII.

629 (D) Alluvial diagram of spatio-temporal ZGA. Tissue-specificity inferred from regional transcript  
630 enrichments along the animal-vegetal or the dorso-ventral axes or both (Blitz et al., 2017).

631 (E) ZGA-associated enrichment of biological processes.

632 (F) Length of maternal and/or zygotic genes. \*,  $p < 1.9e-7$  (Wilcoxon rank-sum test against  
633 maternal and post-MBT activated genes);  $r_{\text{effect}} 0.06$  ('MBT' vs 'Egg') -  $0.48$  ('128' vs 'mG').

634 (G) Maternal/zygotic contribution to the transcriptome deduced from full-length RNAPII  
635 occupancy and maternally inherited RNA.

636 Abbreviations: 32, 32-cell; 128, 128-cell; 1K, 1,024-cell; MBT, mid-blastula transition; mG, mid-  
637 gastrula; IG, late gastrula; 4sU, 4-thiouridine; Mdn, median; TPM, transcripts per million.

638 See also Figure S1 and Tables S1 and S2.

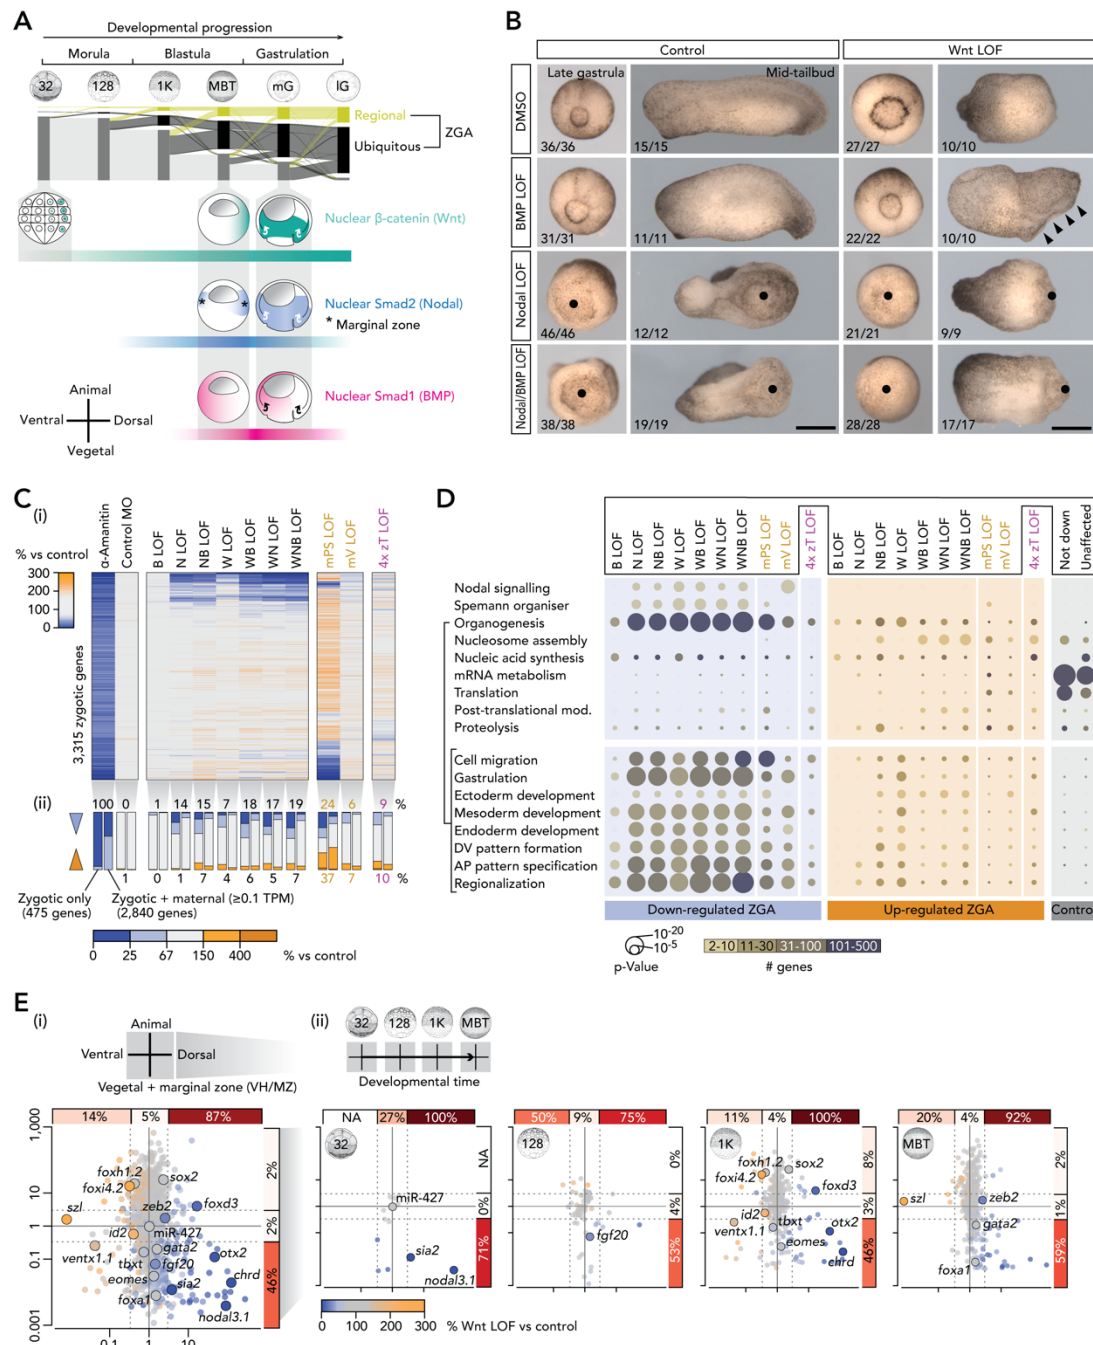

639

640 **Figure 2. Spatio-temporal ZGA Regulated by Canonical Wnt, Nodal and BMP Signals**

641 (A) Spatio-temporal ZGA and nuclear localization of signal mediators  $\beta$ -catenin (canonical  
642 Wnt), Smad2 (Nodal) and Smad1 (BMP) (Faure et al., 2000; Larabell et al., 1997; Schohl and  
643 Fagotto, 2002) from the 32-cell to the late gastrula stage.

644 (B) Morphological phenotypes of single and combined signal LOFs at the late gastrula and the  
645 mid-tailbud stage. Left ('control') pictures are taken from Gentsch et al. (2018b). Bullet points,  
646 failed blastopore formation. Arrowheads, excessive neural fold formation. Scale bar, 0.5 mm.

647 (C) Heat map (i) and bar graph summary (ii) of ZGA mis-regulated in various LOF embryos:  $\alpha$ -  
648 amanitin, positive control; control MO, negative control. Abbreviations: B, BMP; N, Nodal; W,  
649 canonical Wnt; mPS, maternal Pou5f3/Sox3; mV, maternal VegT; 4x zT, four zygotic T-box TFs  
650 (zygotic VegT, Eomes, Tbx2 and Tbx2.2).

651 (D) Biological processes enriched with mis-regulated and control (not down-regulated or  
 652 unaffected by the loss of maternal TFs or signaling) sets of zygotic genes under indicated LOFs.  
 653 (E) Summary (i) and temporal resolution (ii) of Wnt LOF effects on regional ZGA. Percentages  
 654 only refer to the down-regulated genes among all zygotic genes with similar expression ratios  
 655 along the animal-vegetal or the dorso-ventral axes.  
 656 See also Figure S2, Tables S1 and S3, and Movie S1.

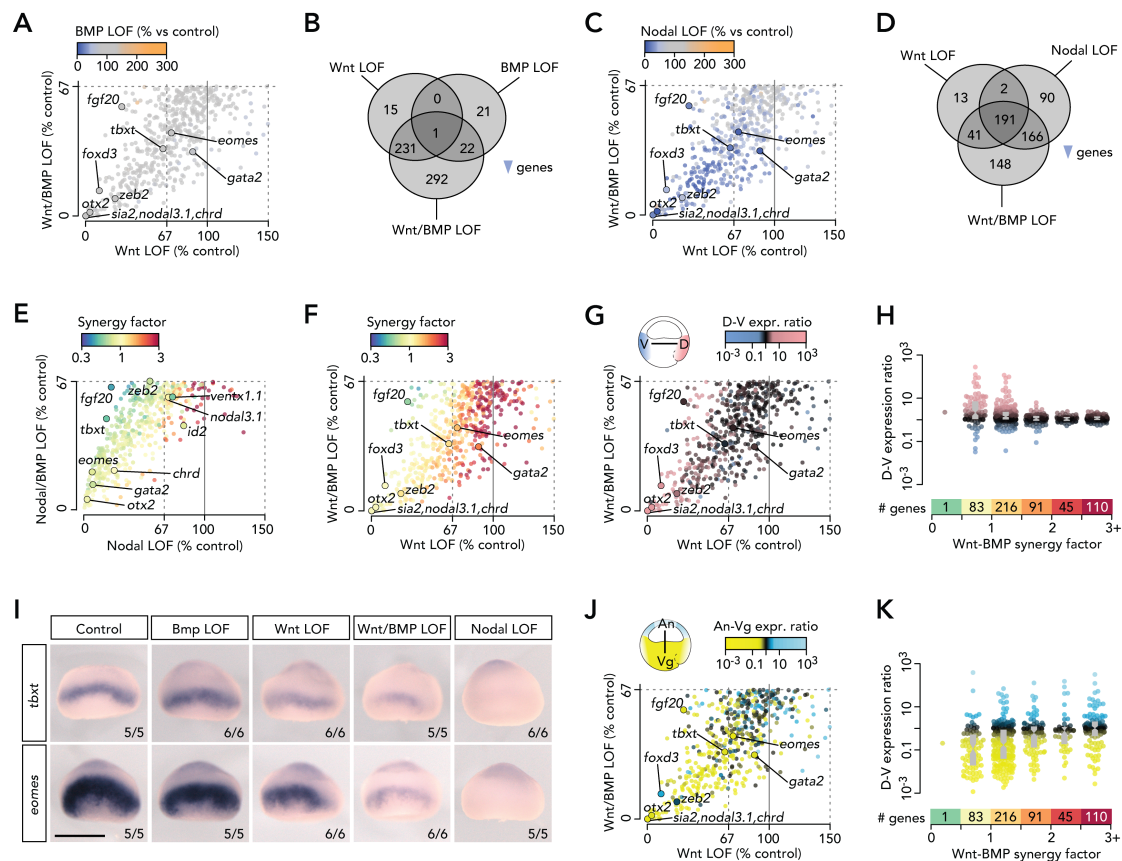

657 **Figure 3. Uniform Gene Expression Across Dorso-Ventral Axis Achieved by Wnt/BMP**  
 658 **Synergy.**  
 659

660 (A,C,E,F,G,J) Scatter plots of relative (% to control) transcript levels between indicated LOFs  
 661 with each dot (gene) color-coded according to a third attribute: (A,B) relative (% to control)  
 662 transcript levels, (E,F) synergy factors between single inductive signals, and (G,J) regional  
 663 expression ratios between opposite ends of the indicated axis.

664 (B,D) Venn diagram of down-regulated genes by indicated LOFs.

665 (H,K) Box and beeswarm plots of regional expression (as measured along the indicated axes)  
 666 depending on increased Wnt-BMP synergy.

667 (I) WMISH of *tbxt* and *eomes* transcripts under various LOFs. Control and Nodal LOF pictures  
 668 are from Gentsch et al. (2018b).

669 See also Figure S3 and Table S3.

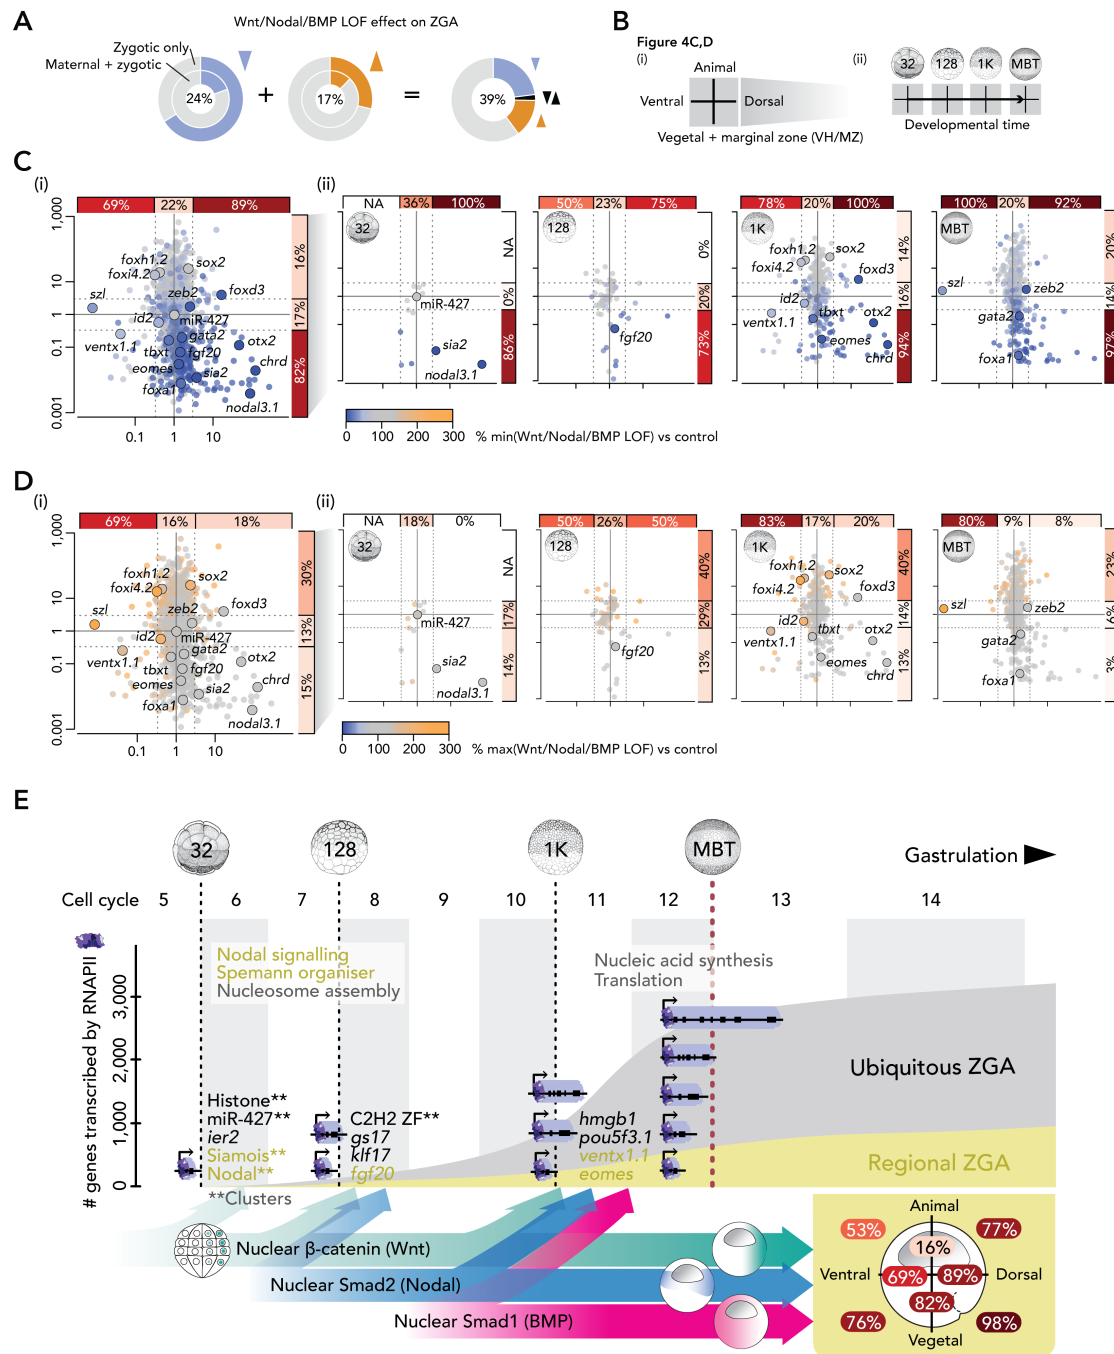

670

671 **Figure 4. Canonical Wnt, Nodal and BMP Signals Induce the Majority of Regional ZGA.**

672 (A) Total percentage of active (zygotic only and maternal-zygotic) genes mis-regulated by Wnt,  
673 Nodal and/or BMP LOF.

674 (B) Graphical explanations of figure panels (C) and (D).

675 (C,D) Summary (i) and temporal resolution (ii) of minimal (C) and maximal (D) transcript levels  
676 of active genes (separated by regional expression along the primary body axes) detected  
677 among Wnt, Nodal and/or BMP LOFs. Percentages only refer to the down-regulated (C) or up-  
678 regulated (D) genes among all zygotic genes with the same range of expression ratios along  
679 the animal-vegetal or dorso-ventral axes.

680 (E) Exponential activation of gradually longer genes before the MBT (bulk ZGA) when cell  
681 divisions occur at rapid and nearly constant intervals (~20 min at 28°C). Sequential induction

682 of the canonical Wnt, Nodal and BMP pathway is critical to high percentages of regional ZGA  
683 (as measured along the two primary body axes within the indicated halves and quadrants of an  
684 early gastrula embryo): e.g. ~89% or ~98% of gene expression enriched in the dorsal half or  
685 vegetal-dorsal quadrant, respectively.

686 SUPPLEMENTAL INFORMATION

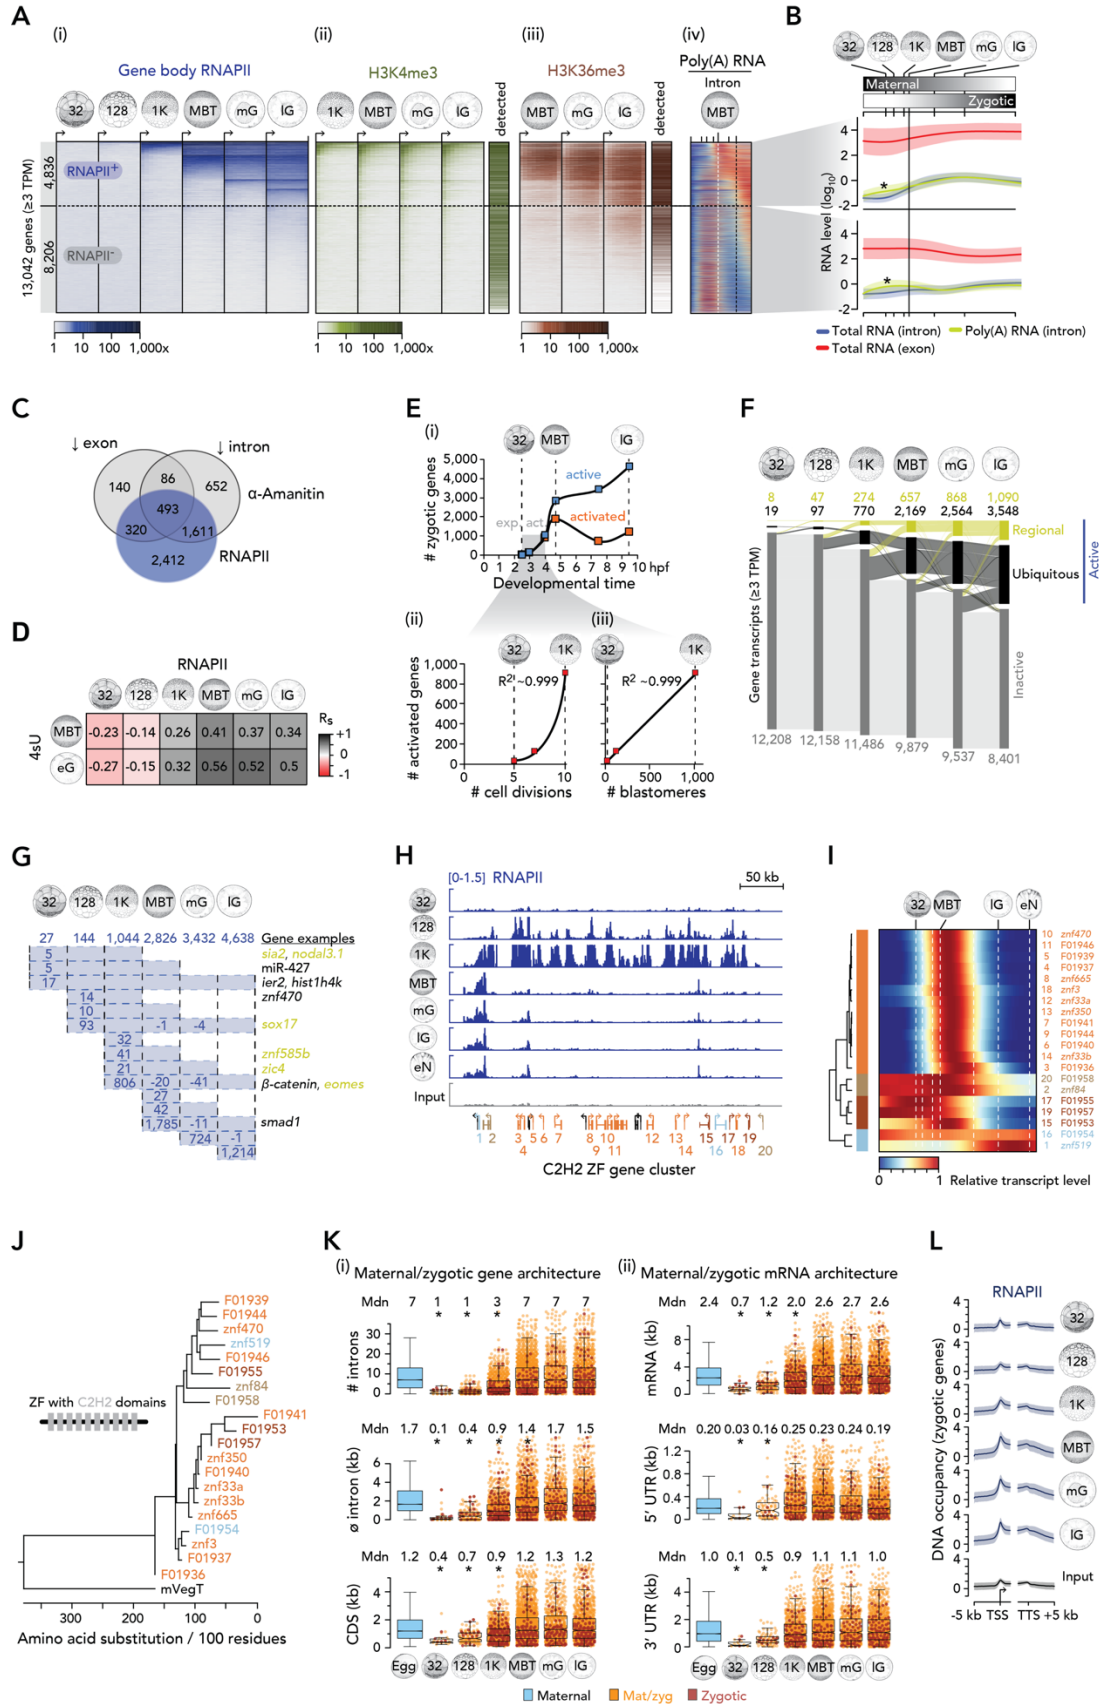

687

688

Figure S1. Dynamics and Architecture of ZGA in *X. tropicalis*, Related to Figure 1.

689 (A) Progression of ZGA from the 32-cell to the late gastrula stage based on (i) whole gene body  
690 (full-length) occupancy of RNAPII (i.e., RNAPII was enriched across entire gene bodies; see  
691 Transparent Methods). Co-aligned: Active histone marks H3K4me1 (ii) and H3K36me3 (iii)  
692 (Hontelez et al., 2015) and intronic signal from the high time-resolution profile of poly(A) RNA  
693 (iv) (Owens et al., 2016). The horizontal dotted line separates RNAPII-engaged (RNAPII<sup>+</sup>) from  
694 non-engaged (RNAPII<sup>-</sup>) genes as detected until the late gastrula stage. The vertical dotted lines  
695 in the poly(A) RNA plot indicate the developmental time points of the MBT (white) and the late  
696 gastrula stage (black), respectively.

697 (B) Transcript feature levels (mean +/- SD) during the maternal-to-zygotic transition. Asterisk,  
698 polyadenylation immediately after fertilization (Collart et al., 2014) transiently increased the  
699 intronic signal obtained from the poly(A) RNA samples.

700 (C) Venn diagram of zygotic genes detected by full-length RNAPII occupancy or reduced exonic  
701 or intronic transcript counts upon blocking RNAPII-mediated transcription with  $\alpha$ -amanitin.

702 (D) Pairwise Spearman's correlations ( $R_s$ ) of enrichment values resulting from RNAPII profiling  
703 and 4sU tagging to detect zygotic genes at indicated developmental stages.

704 (E) Plots of the number of active and newly activated genes (i) or newly activated genes versus  
705 the developmental time (i), the number of completed cell divisions (ii) or formed blastomeres  
706 (iii).

707 (F) Alluvial diagram of spatio-temporal ZGA including maternally inherited RNA transcripts of  
708 genes not activated by the late gastrula stage. Tissue-specificity inferred from regional  
709 transcript enrichments along the animal-vegetal or the dorso-ventral or both axes (Blitz et al.,  
710 2017).

711 (G) Numbers of genes with full-length RNAPII occupancy at indicated developmental stages.  
712 Examples of ubiquitously (black) and tissue-specifically (orange) expressed genes are listed to  
713 the right.

714 (H) RNAPII dynamics at the Cys2-His2 [C2H2] zinc finger (ZF) cluster from the 32-cell to the  
715 early neurula stage.

716 (I) Expression dynamics of C2H2 ZF genes normalized to maximal transcript levels recorded  
717 between fertilization and 23.5 hpf (Owens et al., 2016).

718 (J) Phylogenetic tree of the C2H2 ZF genes shown in (H,I). Maternal VegT (mVegT), outgroup  
719 TF of this phylogenetic tree.

720 (K) Box and beeswarm plots showing various metrics of the zygotic/maternal genes (i) and  
721 mRNA (ii) during ZGA. Asterisks, significant Wilcoxon rank-sum tests against maternal and  
722 post-MBT activated genes and corresponding effect sizes ( $r_{\text{effect}}$ ): # introns,  $p < 2.1e-13$ ,  $r_{\text{effect}}$   
723 0.07-0.43;  $\emptyset$  intron (kb),  $p < 7.9e-7$ ,  $r_{\text{effect}}$  0.07-0.42; CDS (kb),  $p < 3e-7$ ,  $r_{\text{effect}}$  0.05-0.27; mRNA  
724 (kb),  $p < 7e-11$ ,  $r_{\text{effect}}$  0.06-0.32; 5' UTR (kb),  $p < 0.015$ ,  $r_{\text{effect}}$  0.03-0.15; and 3' UTR (kb),  $p < 1.4e-$   
725  $6$ ,  $r_{\text{effect}}$  0.04-0.21.

726 (L) Meta-profiles (mean +/- SD) of RNAPII (separated by developmental stage) and input  
727 (negative control) densities at zygotic genes.



728 Abbreviations: 32, 32-cell; 128, 128-cell; 1K, 1,024-cell; MBT, mid-blastula transition; mG, mid-  
729 gastrula; IG, late gastrula; eN, early neurula; 4sU, 4-thiouridine; Mdn, median; TPM, transcripts  
730 per million.

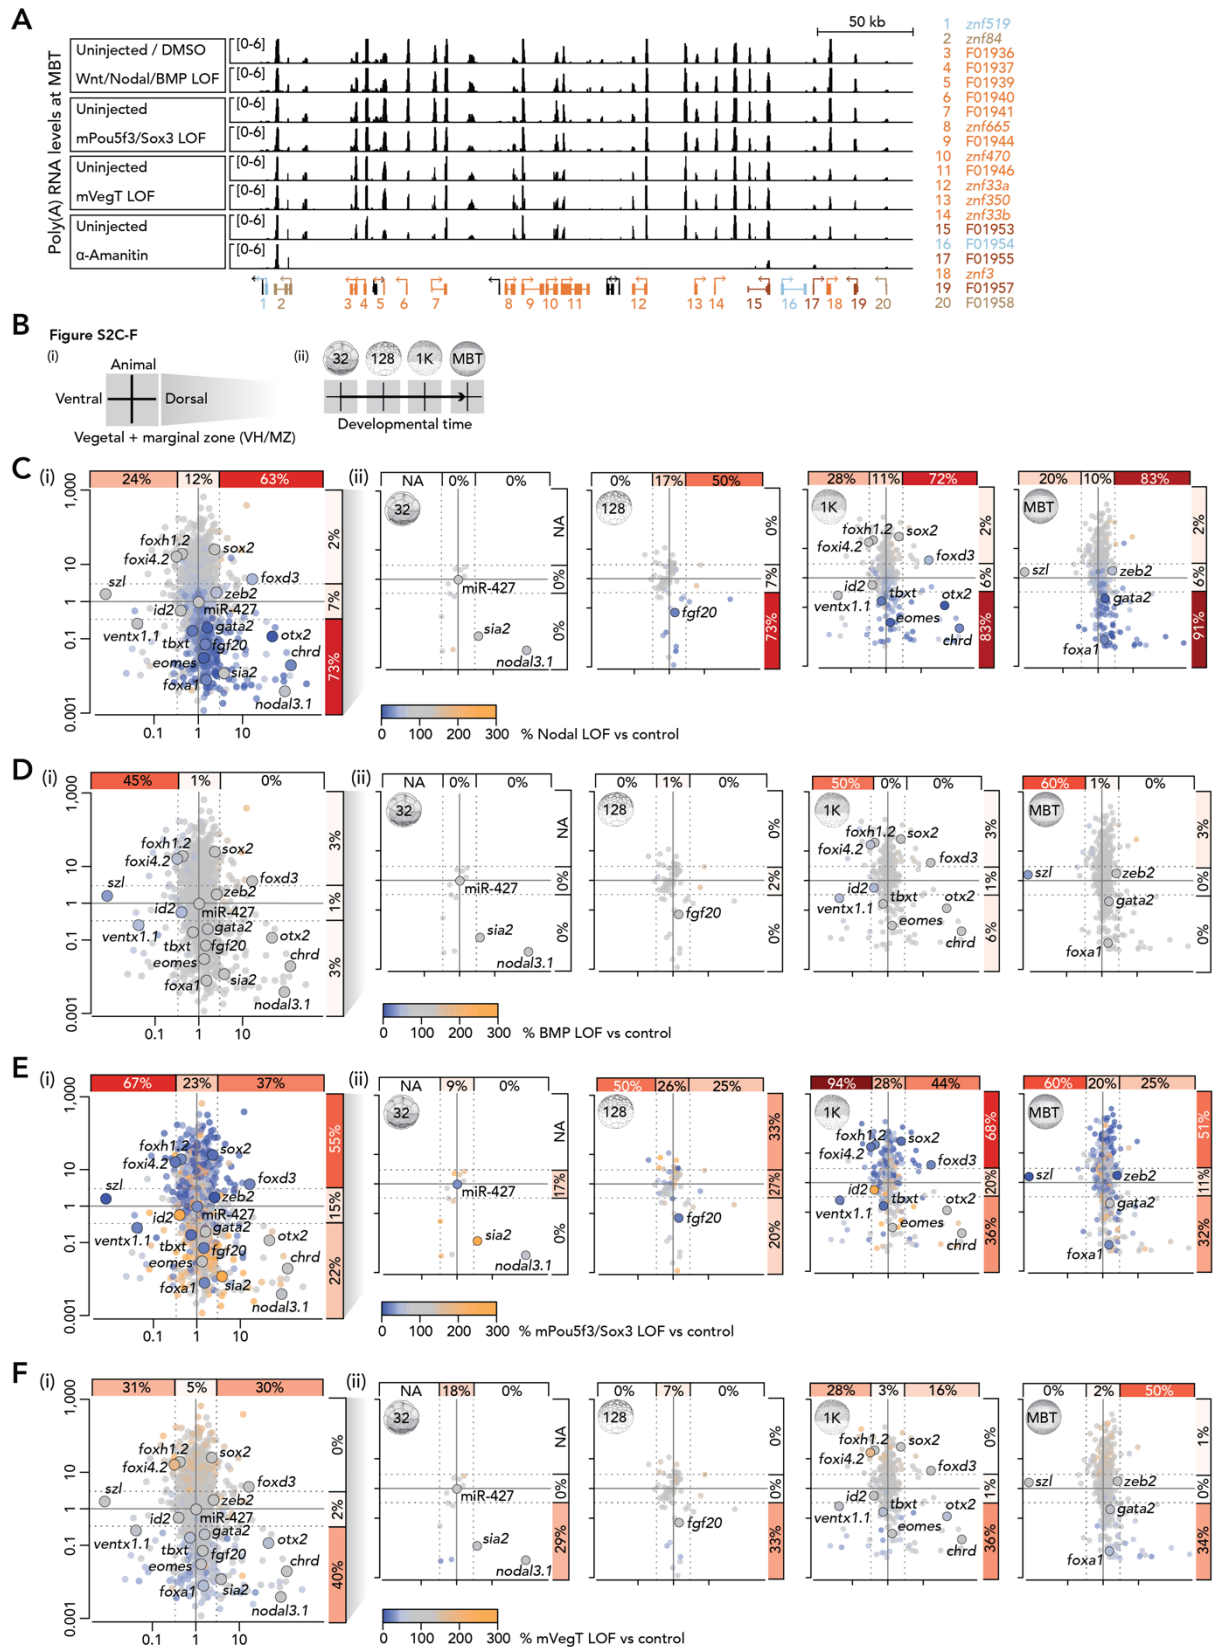

731

732

**Figure S2. Effect of Canonical Wnt, Nodal and BMP Signals on ZGA, Related to Figure 2.**

733

(A) Poly(A) RNA profiles of the C2H2 ZF cluster (Figure S1H) for indicated control and LOFs at

734

the MBT.

735

(B) Graphical explanations of figure panels (C-F).

736 (C-F) Summary (i) and temporal resolution (ii) of gene mis-regulations upon the LOF of Nodal  
 737 (C) or BMP (D) signaling or maternal Pou5f3/Sox3 (mPou5f3/Sox3) (E) or VegT (mVegT) (F).  
 738 Percentages only refer to the down-regulated genes (by  $\geq 1/3$  compared to control expression  
 739 level) among all zygotic genes with the same range of expression ratios along the animal-  
 740 vegetal or the dorso-ventral axes.

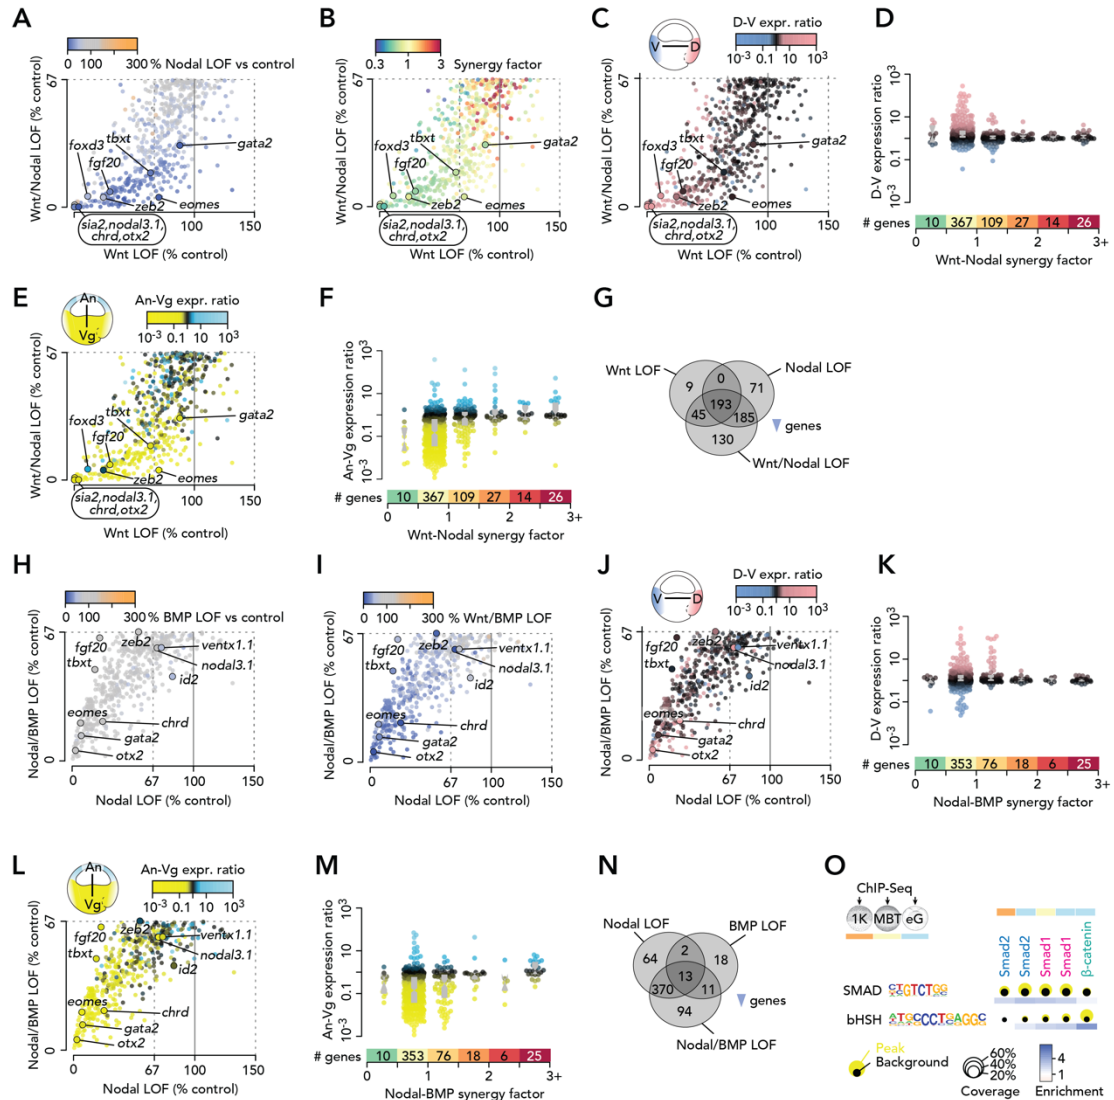

741 **Figure S3. Relationship between Canonical Wnt, Nodal and BMP to Control Regional**  
 742 **ZGA, Related to Figure 3.**

744 (A-C,E,H-J,L) Scatter plots of relative (% to control) transcript levels between indicated LOFs  
 745 with each dot (gene) color-coded according to a third attribute: (A,H,I) relative (% to control)  
 746 transcript levels, (B) synergy factors between single inductive signals, and (C,E,J,L) regional  
 747 expression ratios between opposite ends of the indicated axis.

748 (G,N) Venn diagram of down-regulated genes by indicated LOFs.

749 (D,F,K,M) Box and beeswarm plots of regional expression (as measured along the indicated  
 750 axes) depending on increased Wnt-Nodal (D,F) or Nodal-BMP (K,M) synergy.

751 (O) Coverage and enrichment of Smad and  $\beta$ -catenin-associated DNA motifs (SMAD and

752 bHSH motifs) at endogenous binding sites of  $\beta$ -catenin, Smad1, Smad2 (Gentsch et al., 2018b)  
 753 at indicated developmental stages (color-coded).

754 **SUPPLEMENTAL TABLES**

755 **Table S1. Summary of Deep sequencing and Read Alignments, Related to Figure 1 and**  
 756 **2.**

757 The meta-data of ChIP-Seq, 4sU-Seq and RNA-Seq runs includes the developmental stage,  
 758 condition, read type, and total and genome-aligned read numbers. \*, all rows represent  
 759 manually collected biological sample: a, b and c mark biological replicates. †, library was  
 760 sequenced twice. Reads were pooled from both sequencing runs. ¶, reported numbers are  
 761 reads that are non-redundantly aligned to the genome assembly 7.1 with a mapping quality  
 762 (MAPQ) of 10 (DNA) and 255 (RNA). NF, staging according to Nieuwkoop and Faber (1994).  
 763 PE/SExx, paired-end or single-end sequencing plus read length.

| Sample* | Library              | Stage          | NF  | Condition                                                     | PE/SExx  | Total reads | Aligned reads¶ |
|---------|----------------------|----------------|-----|---------------------------------------------------------------|----------|-------------|----------------|
| 1†      | RNAPII ChIP          | 32-cell        | 6   | None                                                          | SE50     | 45,073,468  | 25,451,597     |
| 2†      | RNAPII ChIP          | 128-cell       | 7   | None                                                          | SE50/100 | 65,757,131  | 41,352,403     |
| 3†      | RNAPII ChIP          | 1,024-cell     | 8   | None                                                          | SE50     | 60,445,294  | 37,661,064     |
| 4       | RNAPII ChIP          | MBT            | 8.5 | None                                                          | SE50     | 29,196,397  | 18,402,411     |
| 5       | RNAPII ChIP          | mid-gastrula   | 11  | None                                                          | SE50     | 29,268,648  | 20,085,357     |
| 6†      | RNAPII ChIP          | late gastrula  | 12+ | None                                                          | SE50     | 95,959,570  | 67,591,256     |
| 7       | RNAPII ChIP          | early neurula  | 13+ | None                                                          | SE50     | 47,039,656  | 32,889,013     |
| 8       | 4sU-tagged total RNA | Mid-blastula   | 8+  | 4sU (4-thiouridine)                                           | PE50     | 22,202,216  | 2,738,397      |
| 9       | 4sU-tagged total RNA | Early gastrula | 10+ | 4sU (4-thiouridine)                                           | PE50     | 20,388,030  | 5,212,782      |
| 10      | Total RNA            | Mid-blastula   | 8+  | 4sU (4-thiouridine), input                                    | PE50     | 15,087,016  | 11,451,545     |
| 11      | Total RNA            | Early gastrula | 10+ | 4sU (4-thiouridine), input                                    | PE50     | 14,902,023  | 9,771,572      |
| 12a     | Poly(A)+ RNA         | Late blastula  | 9+  | Wnt LOF ( $\beta$ -catenin MO)                                | PE76     | 39,439,343  | 35,540,116     |
| 12b     | Poly(A)+ RNA         | Late blastula  | 9+  | Wnt LOF ( $\beta$ -catenin MO)                                | PE76     | 53,523,555  | 48,364,696     |
| 12c     | Poly(A)+ RNA         | Late blastula  | 9+  | Wnt LOF ( $\beta$ -catenin MO)                                | PE76     | 50,568,196  | 45,534,243     |
| 13a     | Poly(A)+ RNA         | Late blastula  | 9+  | Wnt/Nodal LOF ( $\beta$ -catenin MO, SB431542)                | PE76     | 43,980,513  | 39,732,439     |
| 13b     | Poly(A)+ RNA         | Late blastula  | 9+  | Wnt/Nodal LOF ( $\beta$ -catenin MO, SB431542)                | PE76     | 44,582,821  | 40,373,045     |
| 13c     | Poly(A)+ RNA         | Late blastula  | 9+  | Wnt/Nodal LOF ( $\beta$ -catenin MO, SB431542)                | PE76     | 37,243,519  | 33,648,196     |
| 14a     | Poly(A)+ RNA         | Late blastula  | 9+  | Wnt/BMP LOF ( $\beta$ -catenin MO, LDN193189)                 | PE76     | 48,440,801  | 44,080,313     |
| 14b     | Poly(A)+ RNA         | Late blastula  | 9+  | Wnt/BMP LOF ( $\beta$ -catenin MO, LDN193189)                 | PE76     | 40,989,331  | 37,188,245     |
| 14c     | Poly(A)+ RNA         | Late blastula  | 9+  | Wnt/BMP LOF ( $\beta$ -catenin MO, LDN193189)                 | PE76     | 42,494,161  | 38,527,873     |
| 15a     | Poly(A)+ RNA         | Late blastula  | 9+  | Wnt/Nodal/BMP LOF ( $\beta$ -catenin MO, SB431542, LDN193189) | PE76     | 52,761,134  | 47,815,313     |
| 15b     | Poly(A)+ RNA         | Late blastula  | 9+  | Wnt/Nodal/BMP LOF ( $\beta$ -catenin MO, SB431542, LDN193189) | PE76     | 55,128,794  | 50,165,817     |
| 15c     | Poly(A)+ RNA         | Late blastula  | 9+  | Wnt/Nodal/BMP LOF ( $\beta$ -catenin MO, SB431542, LDN193189) | PE76     | 57,414,981  | 52,101,210     |
| 16a     | Poly(A)+ RNA         | Late blastula  | 9+  | Control (uninjected, DMSO)                                    | PE76     | 42,248,469  | 37,989,215     |
| 16b     | Poly(A)+ RNA         | Late blastula  | 9+  | Control (uninjected, DMSO)                                    | PE76     | 52,066,825  | 47,105,847     |
| 16c     | Poly(A)+ RNA         | Late blastula  | 9+  | Control (uninjected, DMSO)                                    | PE76     | 42,875,722  | 38,893,706     |

|              |              |                |     |                                                               |      |                      |                      |
|--------------|--------------|----------------|-----|---------------------------------------------------------------|------|----------------------|----------------------|
| 17a          | Poly(A)+ RNA | Late blastula  | 9+  | Nodal LOF (SB431542)                                          | PE76 | 47,946,077           | 43,367,783           |
| 17b          | Poly(A)+ RNA | Late blastula  | 9+  | Nodal LOF (SB431542)                                          | PE76 | 43,201,587           | 39,270,622           |
| 17c          | Poly(A)+ RNA | Late blastula  | 9+  | Nodal LOF (SB431542)                                          | PE76 | 47,497,608           | 43,105,868           |
| 18a          | Poly(A)+ RNA | Late blastula  | 9+  | Bmp LOF (LDN193189)                                           | PE76 | 49,171,585           | 44,430,698           |
| 18b          | Poly(A)+ RNA | Late blastula  | 9+  | Bmp LOF (LDN193189)                                           | PE76 | 35,247,462           | 31,937,946           |
| 18c          | Poly(A)+ RNA | Late blastula  | 9+  | Bmp LOF (LDN193189)                                           | PE76 | 40,645,238           | 36,899,368           |
| 19a          | Poly(A)+ RNA | Late blastula  | 9+  | Nodal/BMP LOF (SB431542, LDN193189)                           | PE76 | 49,865,847           | 45,127,683           |
| 19b          | Poly(A)+ RNA | Late blastula  | 9+  | Nodal/BMP LOF (SB431542, LDN193189)                           | PE76 | 48,875,533           | 44,167,262           |
| 19c          | Poly(A)+ RNA | Late blastula  | 9+  | Nodal/BMP LOF (SB431542, LDN193189)                           | PE76 | 49,397,754           | 44,710,470           |
| 20a          | Poly(A)+ RNA | Early gastrula | 10+ | 4x zT (4 zygotic T-box TFs) LOF (zVegT, Eomes, Tbx, Tbx.2 MO) | PE76 | 70,597,621           | 63,789,737           |
| 20b          | Poly(A)+ RNA | Early gastrula | 10+ | 4x zT (4 zygotic T-box TFs) LOF (zVegT, Eomes, Tbx, Tbx.2 MO) | PE76 | 62,453,340           | 56,799,027           |
| 20c          | Poly(A)+ RNA | Early gastrula | 10+ | 4x zT (4 zygotic T-box TFs) LOF (zVegT, Eomes, Tbx, Tbx.2 MO) | PE76 | 66,378,689           | 60,011,884           |
| 20d          | Poly(A)+ RNA | Early gastrula | 10+ | 4x zT (4 zygotic T-box TFs) LOF (zVegT, Eomes, Tbx, Tbx.2 MO) | PE76 | 53,693,870           | 48,621,416           |
| 21a          | Poly(A)+ RNA | Mid-gastrula   | 11+ | 4x zT (4 zygotic T-box TFs) LOF (zVegT, Eomes, Tbx, Tbx.2 MO) | PE76 | 60,071,724           | 53,786,168           |
| 21b          | Poly(A)+ RNA | Mid-gastrula   | 11+ | 4x zT (4 zygotic T-box TFs) LOF (zVegT, Eomes, Tbx, Tbx.2 MO) | PE76 | 49,856,218           | 44,780,174           |
| 21c          | Poly(A)+ RNA | Mid-gastrula   | 11+ | 4x zT (4 zygotic T-box TFs) LOF (zVegT, Eomes, Tbx, Tbx.2 MO) | PE76 | 57,420,101           | 51,441,091           |
| 21d          | Poly(A)+ RNA | Mid-gastrula   | 11+ | 4x zT (4 zygotic T-box TFs) LOF (zVegT, Eomes, Tbx, Tbx.2 MO) | PE76 | 57,421,959           | 51,207,446           |
| 22a          | Poly(A)+ RNA | Late gastrula  | 12+ | 4x zT (4 zygotic T-box TFs) LOF (zVegT, Eomes, Tbx, Tbx.2 MO) | PE76 | 59,905,689           | 53,050,487           |
| 22b          | Poly(A)+ RNA | Late gastrula  | 12+ | 4x zT (4 zygotic T-box TFs) LOF (zVegT, Eomes, Tbx, Tbx.2 MO) | PE76 | 76,564,052           | 67,801,662           |
| 22c          | Poly(A)+ RNA | Late gastrula  | 12+ | 4x zT (4 zygotic T-box TFs) LOF (zVegT, Eomes, Tbx, Tbx.2 MO) | PE76 | 54,924,184           | 48,697,757           |
| 22d          | Poly(A)+ RNA | Late gastrula  | 12+ | 4x zT (4 zygotic T-box TFs) LOF (zVegT, Eomes, Tbx, Tbx.2 MO) | PE76 | 56,546,178           | 49,962,419           |
| 23a          | Poly(A)+ RNA | Early gastrula | 10+ | Control (standard control MO)                                 | PE76 | 57,881,388           | 52,311,548           |
| 23b          | Poly(A)+ RNA | Early gastrula | 10+ | Control (standard control MO)                                 | PE76 | 49,193,836           | 44,649,709           |
| 23c          | Poly(A)+ RNA | Early gastrula | 10+ | Control (standard control MO)                                 | PE76 | 78,605,062           | 70,838,519           |
| 23d          | Poly(A)+ RNA | Early gastrula | 10+ | Control (standard control MO)                                 | PE76 | 67,143,066           | 60,397,172           |
| 24a          | Poly(A)+ RNA | Mid-gastrula   | 11+ | Control (standard control MO)                                 | PE76 | 50,011,338           | 44,604,698           |
| 24b          | Poly(A)+ RNA | Mid-gastrula   | 11+ | Control (standard control MO)                                 | PE76 | 54,847,378           | 48,981,425           |
| 24c          | Poly(A)+ RNA | Mid-gastrula   | 11+ | Control (standard control MO)                                 | PE76 | 56,633,663           | 50,510,544           |
| 24d          | Poly(A)+ RNA | Mid-gastrula   | 11+ | Control (standard control MO)                                 | PE76 | 69,504,876           | 61,831,845           |
| 25a          | Poly(A)+ RNA | Late gastrula  | 12+ | Control (standard control MO)                                 | PE76 | 53,566,350           | 47,558,871           |
| 25b          | Poly(A)+ RNA | Late gastrula  | 12+ | Control (standard control MO)                                 | PE76 | 36,043,121           | 31,918,744           |
| 25c          | Poly(A)+ RNA | Late gastrula  | 12+ | Control (standard control MO)                                 | PE76 | 48,184,154           | 42,775,598           |
| 25d          | Poly(A)+ RNA | Late gastrula  | 12+ | Control (standard control MO)                                 | PE76 | 39,860,708           | 35,323,477           |
| <b>Total</b> |              |                |     |                                                               |      | <b>2,948,234,870</b> | <b>2,524,336,789</b> |

764 **Table S2. Temporal Progression of ZGA, Related to Figure 1.**

765 Activated genes are listed according to the earliest developmental stage of full-length RNAPII  
 766 occupancy. The lists also include the overall enrichment of RNAPII across the gene body, the  
 767 maternal contribution (TPM) (Owens et al., 2016) and the enrichment of de novo synthesized  
 768 transcripts determined by 4sU tagging at the MBT and the early gastrula stage.

769 **Table S3. Differential ZGA Analysis, Related to Figure 2, 3 and 4.**

770 Differential expression analysis of genes showing  $\geq 50\%$  (FDR  $\leq 10\%$ ) reduced transcript levels  
771 in  $\alpha$ -amanitin-injected embryos. Normalized transcript levels (inferred from exon or intron  
772 counts) are scaled (percentage, %) to the expression level in control embryos. The list also  
773 includes FDRs, expression ratios across the animal-vegetal or dorso-ventral axis (Blitz et al.,  
774 2017), the earliest developmental stage of full-length RNAPII occupancy, and average  
775 expression levels between 0 and 1 hpf (maternal) and 5 and 9 hpf (from the MBT to the mid-  
776 gastrula stage).

#### 777 **Movie S1. Quadruple LOF of Zygotic T-box TFs, Related to Figure 2.**

778 Simultaneous filming of the vegetal (top row) and animal (bottom row) hemisphere of 4x zT  
779 LOF (labelled as T-box KD in the movie) (left) and control (right) embryos from early gastrula  
780 to mid-tailbud stage.

#### 781 **TRANSPARENT METHODS**

#### 782 **CONTACT FOR REAGENTS AND RESOURCE SHARING**

783 Further information and requests for resources and reagents should be directed to and will be  
784 fulfilled by the Lead Contact, James C. Smith ([jim.smith@crick.ac.uk](mailto:jim.smith@crick.ac.uk)).

#### 785 **EXPERIMENTAL MODEL AND SUBJECT DETAILS**

#### 786 ***Xenopus tropicalis* Manipulation**

787 Standard procedures were used for ovulation, fertilization, and manipulation and incubation of  
788 embryos (Khokha et al., 2002; Sive et al., 2000). Briefly, frogs were obtained from Nasco  
789 (Wisconsin, USA). Ovulation was induced by injecting serum gonadotropin (Intervet) and  
790 chorionic gonadotropin (Intervet) into the dorsal lymph sac of mature female frogs. Eggs were  
791 fertilized *in vitro* with sperm solution consisting of 90% Leibovitz's L-15 medium (Thermo Fisher  
792 Scientific, Cat#11415064) and 10% fetal bovine serum (Thermo Fisher Scientific,  
793 Cat#10500056). After 10 min, fertilized eggs were de-jellied with 2.2% (w/v) L-cysteine (Merck,  
794 Cat#168149) equilibrated to pH 8.0. Embryos were cultured in 5% Marc's Modified Ringer's  
795 solution (MMR) (5 mM NaCl, 0.1 mM KCl, 0.1 mM CaCl<sub>2</sub>, 0.05 mM MgSO<sub>4</sub> and 0.25 mM HEPES  
796 pH7.5) at 21°C-28°C. Embryos were staged according to Nieuwkoop and Faber (1994). All  
797 *Xenopus* work fully complied with the UK Animals (Scientific Procedures) Act 1986 as  
798 implemented by the Francis Crick Institute.

#### 799 **Chromatin immunoprecipitation (ChIP)**

800 ChIP was carried out as detailed previously (Gentsch and Smith, 2017). Briefly, de-jellied *X.*  
801 *tropicalis* embryos were fixed at room temperature with 1% formaldehyde (Merck, Cat#F8775)  
802 in 1% MMR for 25 min. The fixation time was extended to 45 min for pre-gastrula stages. The  
803 following number of embryos were used for ChIP-Seq: 1,400 at the 32-cell stage, 1,000 at the

804 128-cell stage, 700 at the 1,024-cell stage, 450 at the MBT and 350 for the post-MBT stages.  
805 Fixation was terminated by rinsing embryos three times with ice-cold 1% MMR. Fixed embryos  
806 were homogenized in CEWB1 (150 mM NaCl, 1 mM EDTA, 1% (v/v) Igepal CA-630 [Merck,  
807 Cat#I3021], 0.25% (w/v) sodium deoxycholate [Merck, Cat#SRE0046], 0.1% (w/v) sodium  
808 dodecyl sulfate [Merck, Cat#71729] and 10 mM Tris-HCl pH 8.0) supplemented with 0.5 mM  
809 DL-Dithiothreitol (Fluorochem, Cat#M02712) and protease inhibitors (Roche,  
810 Cat#11873580001). The homogenate was left on ice for 5 min and then centrifuged at 1,000 g  
811 (4°C) for 5 min. Homogenization and centrifugation was repeated once before resuspending  
812 the pellet in 1-3 ml CEWB1. Chromatin was solubilized and fragmented by microtip-mediated  
813 ultra-sonication (Misonix 3000 sonicator with a tapered 1/16-inch microtip). The solution of  
814 fragmented chromatin was cleared by centrifuging at 16,000 g (4°C) for 5 min. About 1% of the  
815 cleared chromatin extract was set aside for the input sample (negative control). The remaining  
816 chromatin was incubated overnight at 4°C on a vertical rotor (10 rpm) with 20 µl of the mouse  
817 monoclonal anti-RNAPII (8WG16) (Covance, Cat#MMS-126R; RRID: AB\_10013665) antibody.  
818 After adding 100 µl of washed protein G magnetic beads (Thermo Fisher Scientific,  
819 Cat#10003D) the solution was incubated for another 4 h at 4°C on a vertical rotor (10 rpm). The  
820 beads were washed eight times in CEWB1 and once in TEN (10 mM Tris-HCl pH 8.0, 150 mM  
821 NaCl and 1 mM EDTA) at 4°C. ChIP was eluted off the beads twice with 100 µl SDS elution  
822 buffer (50 mM Tris-HCl pH 8.0, 1 mM EDTA and 1% (w/v) sodium dodecyl sulfate) at 65°C.  
823 ChIP eluates were pooled before reversing DNA-protein cross-links. Input (filled up to 200 µl  
824 with SDS elution buffer) and ChIP samples were supplemented with 10 µl 5 M NaCl and  
825 incubated at 65°C for 6-16 h. Samples were treated with proteinase K (Thermo Fisher Scientific,  
826 Cat#AM2548) and RNase A (Thermo Fisher Scientific, Cat#12091021) to remove any proteins  
827 and RNA from the co-immunoprecipitated DNA fragments. The DNA was purified with  
828 phenol:chloroform:isoamyl alcohol (25:24:1, pH 7.9) (Thermo Fisher Scientific, Cat#AM9730)  
829 using 2.0-ml Phase Lock Gel Heavy microcentrifuge tubes (VWR, Cat#733-2478) for phase  
830 separation and precipitated with 1/70 volume of 5 M NaCl, 2 volumes of absolute ethanol and  
831 15 µg GlycoBlue (Thermo Fisher Scientific, Cat#AM9516). After centrifugation, the DNA pellet  
832 was air-dried and dissolved in 11 µl elution buffer (10 mM Tris-HCl pH 8.5). The DNA  
833 concentration was determined on a Qubit fluorometer using high-sensitivity reagents for  
834 detecting double-stranded DNA (10 pg/µl to 100 ng/µl) (Thermo Fisher Scientific, Cat#Q33231).

835

### 836 **ChIP-Seq Library Preparation**

837 Using the KAPA Hyper Prep Kit (Roche, Cat#KK8504), 2.5-5 ng ChIP DNA or 5 ng input DNA were  
838 converted into indexed paired-end libraries as previously described (Gentsch and Smith, 2017).  
839 Briefly, DNA fragments were end-repaired and A-tailed for 30 min at 20°C followed by 30 min at  
840 65°C before cooling to 4°C. 7.5 pmol TruSeq (single index) Y-adapters (IDT) were ligated to the  
841 DNA fragment ends for 20 min at 20°C. The DNA ligation product was extracted with 0.8x SPRI  
842 (solid phase reversible immobilisation) beads (Beckman Coulter, Cat#A63882) and amplified in  
843 five PCR cycles (15 sec at 98°C, 30 sec at 60°C and 30 sec at 72°C) using the KAPA high-fidelity

844 polymerase master mix (Roche, Cat#KK2602) and 25 pmol Illumina P5 (forward) and P7 (reverse)  
845 primers (IDT). After cleaning up the PCR reaction with 1x SPRI beads, the DNA library was size-  
846 separated by electrophoresis using E-gel EX agarose gels (Thermo Fisher Scientific,  
847 Cat#G401002). A gel slice containing DNA ranging from 250 to 450 bp in size was dissolved  
848 shaking in 350 µl QG buffer (Qiagen) using a thermomixer (1,000 rpm) at room temperature. The  
849 DNA was purified with MinElute columns (Qiagen, Cat#28604) and eluted off these columns twice  
850 using 11 µl elution buffer (10 mM Tris-HCl pH 8.5). The library was re-amplified using another 6-8  
851 PCR cycles yielding 100-200 ng DNA without adapter dimer contamination. The DNA library was  
852 cleaned up with 1x SPRI beads.

853

### 854 **Illumina Sequencing**

855 All sequencing libraries were quality controlled: The DNA yield and fragment size distribution were  
856 determined by fluorometry and chip-based capillary electrophoresis, respectively. ChIP-Seq and  
857 RNA-Seq libraries were sequenced on the Illumina HiSeq 2500 and 4000, respectively, by the  
858 Advanced Sequencing Facility of the Francis Crick Institute. Sequencing samples and read  
859 alignment results are summarized in Table S1.

860

### 861 **Post-Sequencing Analysis of ChIP-Seq**

862 Single reads of maximal 50 bases were processed using trim\_galore v0.4.2 (Babraham Institute,  
863 UK) to trim off low-quality bases (default Phred score of 20, i.e. error probability was 0.01) and  
864 adapter contamination from the 3' end. Processed reads were aligned to the *X. tropicalis* genome  
865 assembly v7.1 and v9.1 (for Hilbert curves) running Bowtie2 v2.2.9 (Langmead and Salzberg,  
866 2012) with default settings (Table S1). Alignments were converted to the HOMER's tag density  
867 format (Heinz et al., 2010) with redundant reads being removed (makeTagDirectory -single -tbp 1  
868 -unique -mapq 10 -fragLength 175 -totalReads all). Only uniquely aligned reads (i.e. MAPQ ≥10)  
869 were processed. We pooled all input alignments from various developmental stages (Gentsch et  
870 al., 2018b). This created a comprehensive mappability profile that covered ~400 million unique  
871 base pair positions. For Hilbert curves, tag densities were generated across the genome v9.1 using  
872 sliding (200-bp increments) 400-bp window. Background signals (<0.3 reads per 1 million mapped  
873 reads) were removed. Blacklisted (Gentsch et al., 2018b) regions (except for MIR-427) were  
874 excluded using intersectBed (-v -f 0.5) from BEDtools v2.25.0 (Quinlan and Hall, 2010).

875

### 876 **Detecting Zygotic and Maternal Genes Using RNAPII Profiling and High Time-Resolution** 877 **Transcriptomics**

878 Normalized RNAPII and input tag densities were calculated across the gene body in 10 bins of  
879 equal size. Gene annotations v7.1 were altered based on a few known zygotic isoforms and some  
880 corrections obtained from assembling total and poly(A) RNA (Owens et al., 2016) from stage 6 to  
881 stage 12.5 *de novo* (Pertea et al., 2016). A few genes had previously been annotated as gene  
882 clusters due to assembly uncertainties. We reduced the annotation of polycistronic MIR-427 to the  
883 minus arm (scaffold\_3b:3516900-3523400) and only monitored *noda3.5* and *noda5.3* within their



884 respective gene clusters. Gene bodies with <40% mappability were removed. Here, the threshold  
885 of mappability per bin was set at 10% of the input read density averaged across all gene bodies in  
886 use. Subsequently, enrichment values were only obtained for all mappable bins by dividing read  
887 densities of RNAPII and input. Further, we restricted the analysis to genes for which  $\geq 3$  transcripts  
888 per million (TPM) could be detected on average over three consecutive time points (i.e. over the  
889 developmental time of 1 h) of a high-resolution profile of total RNA (Owens et al., 2016) from  
890 fertilization to after gastrulation (stage 13). Genes were considered active when RNAPII  
891 enrichments along their full length (see thresholds below) and corresponding transcripts ( $\geq 0.1$   
892 TPM) were simultaneously detected. Transcript levels were calculated over three consecutive time  
893 points  $\pm 1$  h from the developmental stage of RNAPII profiling. RNAPII enrichment covered  $\geq 80\%$   
894 of the mappable gene body and reached at least one of the following thresholds: (1) 2.6-fold, (2)  
895 1.8-fold and 1.4-fold at the next or previous stage, (3) 1.4-fold and 1.8-fold at the next or previous  
896 stage, or (4) 1.4-fold over three consecutive stages. The heatmap (Figure 1B and S1A) was sorted  
897 by the developmental stage (1<sup>st</sup>) and the overall fold (2<sup>nd</sup>) of RNAPII enrichment. Zygotic and  
898 maternal contributions to transcriptome (Figure 1G) were based on RNAPII enrichment (see  
899 above) and mean transcript levels ( $\geq 0.1$  TPM) detected between 0 and 1 hpf, respectively.

900

#### 901 **Peak Calling and Motif Enrichment Analysis**

902 Peak calling and motif enrichment analysis were carried out as previously reported (Gentsch et  
903 al., 2018b). Briefly, HOMER v4.8.3 (Heinz et al., 2010) was used to identify the binding sites of  
904 Smad1 (Gentsch et al., 2018b), Smad2 (Chiu et al., 2014; Gentsch et al., 2018b; Yoon et al., 2011)  
905 and  $\beta$ -catenin (Gentsch et al., 2018b; Nakamura et al., 2016) by virtue of ChIP-enriched read  
906 alignments (hereafter called peaks): `findpeaks -style factor -minDist 175 -fragLength 175 -`  
907 `inputFragLength 175 -fdr 0.001 -gsize 1.435e9 -F 3 -L 1 -C 0.97`. This means that both ChIP and  
908 input alignments were extended 3' to 175 bp for the detection of significant (FDR  $\leq 0.1\%$ ) peaks  
909 being separated by  $\geq 175$  bp. The effective size of the *X. tropicalis* genome assembly v7.1 was set  
910 to 1.435 billion bp, an estimate obtained from the mappability profile (Gentsch et al., 2018b). These  
911 peaks showed equal or higher tag density than the surrounding 10 kb,  $\geq 3$ -fold more tags than the  
912 input and  $\geq 0.97$  unique tag positions relative to the expected number of tags. To further eliminate  
913 any false positive peaks, we removed any peaks with  $< 0.5$  CPM and those falling into blacklisted  
914 regions showing equivocal mappability due to genome assembly errors, gaps or simple/tandem  
915 repeats. Regions of equivocal mappability were identified by a two-fold lower (poor) or three-fold  
916 higher (excessive) read coverage than the average detected in 400-bp windows sliding at 200-bp  
917 intervals through normalized ChIP input and DNase-digested naked genomic DNA (Gentsch et al.,  
918 2018b). All identified regions  $\leq 800$  bp apart were subsequently merged. Gap coordinates were  
919 obtained from the Francis Crick mirror site of the UCSC genome browser  
920 (<http://genomes.crick.ac.uk>). Simple repeats were masked with RepeatMasker v4.0.6 (Smit et al.)  
921 using the crossmatch search engine v1.090518 (Phil Green) and the following settings:  
922 `RepeatMasker -species "xenopus silurana tropicalis" -s -xsmall`. Tandem repeats were masked  
923 with Jim Kent's `trfBig` wrapper script of the Tandem Repeat Finder v4.09 (Benson, 1999) using the

924 following settings: weight for match, 2; weight for mismatch, 7; delta, 7; matching probability, 80;  
925 indel probability, 10; minimal alignment score, 50; maximum period size, 2,000; and longest  
926 tandem repeat array (-l), 2 [million bp]. The enrichment and occurrence of predetermined DNA  
927 binding motifs was calculated using 100 bp centred across the top 2,000 peaks per chromatin  
928 feature and developmental stage: findMotifsGenome.pl -size 100 -mknown -nomotif.

929

### 930 **Injections and Treatments of Embryos**

931 Microinjections were performed using calibrated needles and embryos equilibrated in 4% (w/v)  
932 Ficoll PM-400 (Merck, Cat#F4375) in 5% MMR. Microinjection needles were generated from  
933 borosilicate glass capillaries (Harvard Apparatus, GC120-15) using the micropipette puller  
934 Sutter p97. Maximally three nanolitres were injected into the animal hemisphere of de-jellied  
935 zygotes using the microinjector Narishige IM-300. Embryos were transferred to fresh 5% MMR  
936 (without Ficoll PM-400) once they reached about the mid-blastula stage.

937 For profiling the nascent transcriptome, embryos were injected with 75 ng 4-thiouridine-5'-  
938 triphosphate (4sU) (TriLink BioTechnologies, Cat#N-1025), which is incorporated into newly  
939 synthesized transcripts.

940 Loss-of-functions (LOFs) were generated by treating embryos with small molecule inhibitors  
941 and/or injecting them with morpholinos (MOs) or  $\alpha$ -amanitin. MOs were designed and produced  
942 by Gene Tools (Oregon, USA) to block splicing (MO<sub>splice</sub>) or translation (MO<sub>transl</sub>): maternal  
943 Pou5f3/Sox3 (mPou5f3/Sox3) LOF, 5 ng Pou5f3.2 MO<sub>transl</sub> (Chiu et al., 2014; Gentsch et al.,  
944 2018b; GCTGTTGGCTGTACATAGTGTC), 5 ng Pou5f3.3 MO<sub>transl</sub> (Chiu et al., 2014; Gentsch  
945 et al., 2018b; TACATTGGGTGCAGGGACCCTCTCA) and 5 ng Sox3 MO<sub>transl</sub> (Gentsch et al.,  
946 2018b; GTCTGTGTCCAACATGCTATACATC); maternal VegT (mVegT) LOF, 10 ng mVegT  
947 MO<sub>transl</sub> (Gentsch et al., 2018b; Rana et al., 2006; TGTGTTCTGACAGCAGTTTCTCAT);  
948 canonical Wnt LOF, 5 ng  $\beta$ -catenin MO<sub>transl</sub> (Heasman et al., 2000;  
949 TTTCAACAGTTTCCAAAGAACCAGG); LOF of four zygotic T-box TFs (4x zT LOF), 2.5 ng *tbxt*  
950 (*Xbra*, *t*) MO<sub>splice</sub> (Gentsch et al., 2013; TGGAGAGACCCTGATCTTACCTTCC), 2.5 ng *tbxt*  
951 (*Xbra*, *t*) MO<sub>transl</sub> (Gentsch et al., 2013; GGCTTCCAAGCGCACACTGGG), 2.5 ng *tbxt*.2  
952 (*Xbra3*, *t2*) MO<sub>splice</sub> (Gentsch et al., 2013; GAAAGGTCCATATTCTCTTACCTTC), 2.5 ng *tbxt*.2  
953 (*Xbra3*, *t2*) MO<sub>transl</sub> (Gentsch et al., 2013; AGCTGTGCCTGTGCTCATTGTATTG), 5 ng zVegT  
954 MO<sub>transl</sub> (Fukuda et al., 2010; Gentsch et al., 2013; CATCCGGCAGAGAGTGCATGTTCT) and  
955 5 ng *eomes* MO<sub>splice</sub> (Fukuda et al., 2010; Gentsch et al., 2013;  
956 GAACATCCTCCTGCAAAGCAAAGAC); control MO, 5-20 ng standard control MO  
957 (CCTCTTACCTCAGTTACAATTTATA) according to the dose used for the  $\beta$ -catenin, mVegT  
958 and 4x zT LOF experiment; and 30 pg  $\alpha$ -amanitin (BioChemica, Cat#A14850001). To block  
959 Nodal (Nodal LOF) and BMP (BMP LOF) signaling, embryos were treated with 100  $\mu$ M  
960 SB431542 (Tocris, Cat#1614) and/or 10  $\mu$ M LDN193189 (Selleckchem, Cat#S2618) from the  
961 8-cell stage onwards. Control embryos were treated accordingly with DMSO, in which these  
962 antagonists were dissolved. Transcriptional effects of combinatorial signal LOF were

963 determined at late blastula stage (stage 9<sup>+</sup>), while those of all other maternal LOFs were  
964 determined over three consecutive time points: the MBT (stage 8+), the late blastula (stage 9<sup>+</sup>)  
965 and the early gastrula (stage 10<sup>+</sup>) stage. The 4x zT LOF was transcriptionally profiled at early,  
966 mid and late gastrula stage (stage 10<sup>+</sup>, 11<sup>+</sup> and 12<sup>+</sup>). The 4x zT LOF comparison has four  
967 biological replicates (n=4). All other comparisons entail three biological replicates (n=3).

#### 968 **Extraction of Total RNA**

969 Embryos were homogenized in 800  $\mu$ l TRIzol reagent (Thermo Fisher Scientific,  
970 Cat#15596018) by vortexing. The homogenate was either snap-frozen in liquid nitrogen and  
971 stored at -80°C or processed immediately. For phase separation, the homogenate together with  
972 0.2x volume of chloroform was transferred to pre-spun 2.0-ml Phase Lock Gel Heavy  
973 microcentrifuge tubes (VWR), shaken vigorously for 15 sec, left on the bench for 2 min and  
974 spun at ~16,000 g (4°C) for 5 min. The upper phase was mixed well with one volume of 95-  
975 100% ethanol and spun through the columns of the RNA Clean & Concentrator 25 Kit (Zymo  
976 Research, Cat#R1017) at ~12,000 g for 30 sec. Next, the manufacturer's instructions were  
977 followed for the recovery of total RNA (>17 nt) with minor modifications. First, the flow-through  
978 of the first spin was re-applied to the column. Second, the RNA was treated in-column with 3 U  
979 Turbo DNase (Thermo Fisher Scientific, Cat#AM2238). Third, the RNA was eluted twice with  
980 25  $\mu$ l molecular-grade water. The concentration was determined on the NanoDrop 1000  
981 spectrophotometer or by fluorometry before depleting ribosomal RNA from total RNA (Profiling  
982 the Nascent Transcriptome).

#### 983 **Tagging the Nascent Transcriptome**

984 Thirty 4sU-injected embryos were collected at the MBT and the early-to-mid gastrula stage.  
985 Total RNA was extracted as outlined above. The 4sU-tagging was performed according to Gay  
986 et al. (2014) with few minor modifications. The RNA Clean & Concentrator 5 Kit (Zymo  
987 Research, Cat#R1013) was used to purify RNA. Briefly, the Ribo-Zero Gold rRNA Removal Kit  
988 (Illumina, Cat#MRZG126) was used according to the manufacturer's instructions to deplete  
989 ribosomal RNA from ~10  $\mu$ g total RNA. The RNA was purified and fragmented for 4 min at 95°C  
990 using the NEBNext Magnesium RNA Fragmentation Module (NEB, Cat#E6150). The RNA was  
991 purified again before conjugating HDPD-Biotin (Thermo Fisher Scientific, Cat#21341) to 4sU  
992 via disulfide bonds for 3 h in the dark. Purified RNA was mixed with Streptavidin beads (Thermo  
993 Fisher Scientific, Cat#65305) to pull down biotin-tagged RNA. The RNA was eluted off the  
994 beads by treating them twice with 100  $\mu$ l pre-heated (80°C) 100 mM  $\beta$ -mercaptoethanol (Merck,  
995 Cat#M6250), which breaks the disulfide bond between Biotin and 4sU. Subsequently, the RNA  
996 was converted into a deep sequencing library by following the manual instructions (Rev. C,  
997 8/2014) of the ScriptSeq v2 RNA-Seq Library Preparation Kit (Illumina, Cat#SSV21106) starting  
998 with 4.1.A. (Anneal the cDNA Synthesis Primer) and 4.1.B. (Synthesize cDNA), RNA and  
999 ending with part 3.C (Synthesize 3'-Tagged DNA) to 3.G. (Assess Library Quantity and Quality).  
1000 cDNA was purified using 1.8x SPRI beads. Input and 4sU-enriched cDNA were PCR-amplified  
1001 with 11 and 15 cycles, respectively. The 4sU RNA-Seq library was purified with 1x SPRI beads.

## 1002 **Post-Sequencing Analysis of 4sU Tagging**

1003 Paired-end reads were aligned to the *X. tropicalis* transcriptome assembly v7.1 running Bowtie2  
1004 (Langmead and Salzberg, 2012) with the following constraints: -k 200 (maximal allowed number  
1005 of alignments per fragment) -X 800 (maximum fragment length in bp) --rdg 6,5 (penalty for read  
1006 gaps of length N, 6+N\*5) --rfg 6,5 (penalty for reference gaps of length N, 6+N\*5) --score-main  
1007 L,-.6,-.4 (minimal alignment score as a linear function of the read length x,  $f(x) = -0.6 - 0.4*x$ ) -  
1008 -no-discordant (no paired-end read alignments breaching maximum fragment length X) --no-  
1009 mixed (only concordant alignment of paired-end reads). Only read pairs that uniquely align to  
1010 one gene were counted. Raw read counts were normalized with DESeq2 v1.22.1 (Love et al.,  
1011 2014) and then scaled to the input.

## 1012 **Poly(A) RNA-Seq Profiling**

1013 10-15 embryos were collected per stage and condition. Total RNA was extracted as outlined  
1014 above. Libraries were made from ~1 µg total RNA by following the low-sample protocol of the  
1015 TruSeq RNA Library Prep Kit v2 (Illumina, Cat#RS-122-2001) with a few modifications. First, 1 µl  
1016 cDNA purified after second strand synthesis was quantified on a Qubit fluorometer using high-  
1017 sensitivity reagents for detecting double-stranded DNA (10 pg/µl to 100 ng/µl). By this stage, the  
1018 yield was ~10 ng. Second, the number of PCR cycles was reduced to eight to avoid products of  
1019 over-amplification such as chimera fragments.

1020

## 1021 **Poly(A) RNA-Seq Read Alignment**

1022 Paired-end reads were aligned to the *X. tropicalis* genome assembly v7.1 using STAR v2.5.3a  
1023 (Dobin et al., 2013) with default settings. The alignment was guided by a revised version of the  
1024 gene models v7.2 (Collart et al., 2014) to improve mapping accuracy across splice junctions. The  
1025 alignments were sorted by read name using the sort function of Samtools v1.3.1 (Li et al., 2009).  
1026 Exon and intron counts (-t 'exon;intron') were extracted from unstranded (-s 0) alignment files using  
1027 VERSE v0.1.5 (Zhu et al., 2016) in featureCounts (default) mode (-z 0). Intron coordinates were  
1028 adjusted to exclude any overlap with exon annotation. For visualization, genomic BAM files of  
1029 biological replicates were merged using Samtools and converted to the bigWig format. These  
1030 genome tracks were normalized to the wigsum of 1 billion excluding any reads with mapping quality  
1031 <10 using the python script bam2wig.py from RSeQC v2.6.4 (Wang et al., 2012).

1032

## 1033 **Differential Gene Expression Analysis**

1034 Differential expression analysis was performed with both raw exon and intron counts excluding  
1035 those belonging to ribosomal and mitochondrial RNA using the Bioconductor/R package  
1036 DESeq2 v1.22.1 (Love et al., 2014). In an effort to find genes with consistent fold changes over  
1037 time, p-values were generated according to a likelihood ratio test reflecting the probability of  
1038 rejecting the reduced (~ developmental stage) over the full (~ developmental stage + condition)  
1039 model. Resulting p-values were adjusted to obtain false discovery rates (FDR) according to the  
1040 Benjamini-Hochburg procedure with thresholds on Cook's distances and independent filtering  
1041 being switched off. Equally, combinatorial LOF profiling and regional expression datasets (Blitz

1042 et al., 2017) without time series were subjected to likelihood ratio tests with reduced (~ 1) and  
1043 full (~ condition) models for statistical analysis. Fold changes of intronic and exonic transcript  
1044 levels were calculated for each developmental stage and condition using the mean of DESeq2-  
1045 normalized read counts from biological replicates. Both intronic and exonic datasets were  
1046 filtered for  $\geq 10$  DESeq2-normalized read counts that were detected at least at one  
1047 developmental stage in all uninjected or DMSO-treated samples. Gene-specific fold changes  
1048 were removed at developmental stages that yielded  $< 10$  normalized read counts in  
1049 corresponding control samples. Next, the means of intronic and exonic fold changes were  
1050 calculated across developmental stages. The whole dataset was confined to 3,318 genes for  
1051 which at least 50% reductions (FDR  $\leq 10\%$ ) in exonic (default) or intronic counts could be  
1052 detected in  $\alpha$ -amanitin-injected embryos. Regional expression was based on exonic read  
1053 counts by default unless the intronic fold changes were significantly (FDR  $\leq 10\%$ ) larger than  
1054 the exonic fold changes (Table S3). For the hierarchical clustering of relative gene expression  
1055 (Figure 2C), increased transcript levels were masked and only data points from signal LOFs,  
1056 mPou5f3/Sox3 LOF and 4x zT LOF embryos were used. Euclidean distance-derived clusters  
1057 were linked according to Ward's criterion and sorted using the optimal leaf ordering (OLO)  
1058 algorithm. The synergy factor (SF) between signals x and y (Figures 3 and S3) were calculated  
1059 as follows:  $SF_{xy} = \Delta_{xy} / (\Delta_x + \Delta_y)$ .  $\Delta$  is the relative loss of gene expression caused by signal  
1060 depletion. For these calculations, any gene upregulations were neutralised (i.e. set to 1).

#### 1061 **Analysis of Enriched Gene Ontology (GO) Terms**

1062 Over-represented GO terms were found by applying hypergeometric tests of the  
1063 Bioconductor/R package GOSTats v2.42.0 (Falcon and Gentleman, 2007) on gene lists. The  
1064 process was also supported by the Bioconductor/R packages GSEABase v1.44.0 (Morgan et  
1065 al., 2017) and GO.db v3.4.1 (Carlson et al., 2007). The gene universe was associated with GO  
1066 terms by means of BLAST2GO (Conesa et al., 2005) as previously outlined (Collart et al., 2014;  
1067 Gentsch et al., 2015).

#### 1068 **Generation of Hybridization Probes**

1069 Plasmids *X. laevis eomes* pCRII-TOPO (Gentsch et al., 2013) and *X. laevis tbxt (Xbra, t)* pSP73  
1070 (Smith et al., 1991) were linearized by restriction digestion (*Bam*HI and *Bgl*II, respectively) and  
1071 purified using the QIAquick PCR Purification Kit (Qiagen, Cat#28104). The hybridization probes  
1072 were transcribed from ~1  $\mu$ g linearized plasmid using 1x digoxigenin-11-UTP (Roche,  
1073 Cat#11277065910), 40 U RiboLock RNase inhibitor (Thermo Fisher Scientific, Cat#EO0381), 1x  
1074 transcription buffer (Roche) and T7 RNA polymerase (Roche, Cat#10881767001) at 37°C for 2 h.  
1075 The probe was treated with 2 U Turbo DNase (Thermo Fisher Scientific) to remove the DNA  
1076 template and purified by LiCl precipitation. RNA was diluted to 10 ng/ $\mu$ l (10x stock) with  
1077 hybridization buffer. The hybridization buffer (stored at -20°C) consists of 50% formamide (Fisher  
1078 Scientific, Cat#10052370), 5x saline sodium citrate (SSC), 1x Denhardt's solution (Thermo Fisher  
1079 Scientific, Cat#750018), 10 mM EDTA, 1 mg/ml torula RNA (Merck, Cat#R6625), 100  $\mu$ g/ml

1080 heparin (Merck, Cat#H4784), 0.1% (v/v) Tween-20 (Merck, Cat#P9416) and 0.1% (w/v) CHAPS  
1081 (Merck, Cat#C3023).

1082

### 1083 **Whole-Mount In Situ Hybridization (WMISH)**

1084 WMISH was conducted using digoxigenin-labeled RNA probes (Monsoro-Burq, 2007; Sive et  
1085 al., 2000). Briefly, *X. tropicalis* embryos were fixed in MEMFA (100 mM MOPS pH 7.4, 2 mM  
1086 EDTA, 1 mM MgSO<sub>4</sub> and 3.7% formaldehyde) at room temperature for 1 h. The embryos were  
1087 then washed once in 1x PBS and two to three times in ethanol. Fixed and dehydrated embryos  
1088 were kept at -20°C for ≥24 h to ensure proper dehydration before starting hybridization.  
1089 Dehydrated embryos were washed once more in ethanol before rehydrating them in two steps  
1090 to PBT (1x PBS and 0.1% (v/v) Tween-20). Embryos were treated with 5 µg/ml proteinase K  
1091 (Thermo Fisher Scientific) in PBT for 6-8 min, washed briefly in PBT, fixed again in MEMFA for  
1092 20 min and washed three times in PBT. Embryos were transferred into baskets, which were  
1093 kept in an 8x8 microcentrifuge tube holder sitting inside a 10x10 slot plastic box filled with PBT.  
1094 Baskets were built by replacing the round bottom of 2-ml microcentrifuge tubes with a Sefar  
1095 Nitex mesh. This container system was used to readily process several batches of embryos at  
1096 once. These baskets were maximally loaded with 40 to 50 *X. tropicalis* embryos. The  
1097 microcentrifuge tube holder was used to transfer all baskets at once and to submerge embryos  
1098 into subsequent buffers of the WMISH protocol. Next, the embryos were incubated in 500 µl  
1099 hybridization buffer (see recipe above) for 2 h in a hybridization oven set to 60°C. After this pre-  
1100 hybridization step, the embryos were transferred into 500 µl digoxigenin-labeled probe (1 ng/µl)  
1101 preheated to 60°C and further incubated overnight at 60°C. The pre-hybridization buffer was  
1102 kept at 60°C. The next day embryos were transferred back into the pre-hybridization buffer and  
1103 incubated at 60°C for 10 min. Subsequently, they were washed three times in 2x SSC/0.1%  
1104 Tween-20 at 60°C for 10 min, twice in 0.2x SSC/0.1% Tween-20 at 60°C for 20 min and twice  
1105 in 1x maleic acid buffer (MAB) at room temperature for 5 min. Next, the embryos were treated  
1106 with blocking solution (2% Blocking Reagent [Merck, Cat#11096176001] in 1x MAB) at room  
1107 temperature for 30 min, and incubated in antibody solution (10% lamb serum [Thermo Fisher  
1108 Scientific, Cat#16070096], 2% Blocking Reagent [Merck], 1x MAB and 1:2,000 Fab fragments  
1109 from polyclonal anti-digoxigenin antibodies conjugated to alkaline phosphatase [Roche,  
1110 Cat#11093274910; RRID:AB\_514497]) at room temperature for 4 h. The embryos were then  
1111 washed four times in 1x MAB for 10 min before leaving them in 1x MAB overnight at 4°C.

1112

1113 On the final day of the WMISH protocol, the embryos were washed another three times in 1x  
1114 MAB for 20 min and equilibrated to working conditions of alkaline phosphatase (AP) for a total  
1115 of 10 min by submerging embryos twice into AP buffer (50 mM MgCl<sub>2</sub>, 100 mM NaCl, 100 mM  
1116 Tris-HCl pH 9.5 and 1% (v/v) Tween-20). At this stage, the embryos were transferred to 5-ml  
1117 glass vials for monitoring the progression of the AP-catalyzed colorimetric reaction. Any  
1118 residual AP buffer was discarded before adding 700 µl staining solution (AP buffer, 340 µg/ml  
1119 nitro-blue tetrazolium chloride [Roche, Cat#11383213001] and 175 µg/ml 5-bromo-4-chloro-3'-

1120 indolyphosphate [Roche, Cat#11383221001]). The colorimetric reaction was developed at  
1121 room temperature in the dark. Once the staining was clear and intense enough, the color  
1122 reaction was stopped by two washes in 1x MAB. To stabilize and preserve morphological  
1123 features, the embryos were fixed with Bouin's fixative without picric acid (9% formaldehyde and  
1124 5% glacial acetic acid [Fisher Scientific, Cat#10171460]) at room temperature for 30 min. Next,  
1125 the embryos were washed twice in 70% ethanol/PBT to remove the fixative and residual  
1126 chromogens. After rehydration to PBT in two steps, the embryos were treated with weak Curis  
1127 solution (1% (v/v) hydrogen peroxide [Merck, Cat#1072090500], 0.5x SSC and 5% formamide)  
1128 at 4°C in the dark overnight. Finally, the embryos were washed twice in PBS before imaging  
1129 them in PBS on a thick agarose dish by light microscopy.

1130

### 1131 **Processing of External Datasets**

1132 High-time (30-min intervals) resolution of total and poly(A) RNA-Seq (GSE65785) was  
1133 processed as reported in the original publication (Owens et al., 2016). In addition, intron read  
1134 counts were corrected by spike RNA-derived normalization factors. For visualization  
1135 normalized exon and intron counts were scaled to the maximal count detected across the time  
1136 course and fitted using cubic smoothing splines from 0 to 23.5 hpf: `smooth.spline(1:48, x,`  
1137 `spar=0.6)`. Other RNA-Seq (GSE81458) and ChIP-Seq (GSE67974, GSE30146, GSE53654  
1138 and GSE72657) were processed as described in detail above except for H3K4me3 and  
1139 H3K36me3 whose enriched regions were detected as follows: `findPeaks -style histone -`  
1140 `fragLength 175 -inputFragLength 175 -fdr 0.001 -gsize 1.435e9 -F 2 -C 1 -region -size 350 -`  
1141 `minDist 500`. Thus, we detected significant regions of histone modifications (-style histone) of  
1142 at least the lengths of two DNA fragments (-size 350) and being separated by at least 500 bp  
1143 from each other.

1144

### 1145 **Generation of Plots and Heatmaps**

1146 Genomic snapshots were generated with the IGV genome browser v2.4-rc6 (Robinson et al.,  
1147 2011). All plots and heatmaps were generated using R v3.5.1 (<http://cran.r-project.org/>). The  
1148 following add-on R and Bioconductor packages were used for sorting and graphical  
1149 visualization of data: `alluvial v0.1-2` (Michał Bojanowski), `beeswarm v0.2.3` (Aron Eklund),  
1150 `circlize v0.4.5` (Gu et al., 2014), `complexHeatmap v1.20.0` (Gu et al., 2016a), `dplyr v0.7.8`,  
1151 `ggplot2 v3.1.0` (Wickham, 2016), `gplots v3.0.1` (Gregory Warnes and colleagues),  
1152 `GenomicFeatures v1.34.1` (Lawrence et al., 2013), `GenomicRanges v1.38.0` (Lawrence et al.,  
1153 2013), `HilbertCurve v1.12.0` (Gu et al., 2016b), `limma v3.38.2` (Ritchie et al., 2015), `rtracklayer`  
1154 `1.42.1` (Lawrence et al., 2009) and `seriation v1.2-3` (Hahsler et al., 2008).

1155

### 1156 **QUANTIFICATION AND STATISTICAL ANALYSIS**

1157 No statistical method was used for determining sample size; rather, we followed the literature  
1158 to select the appropriate sample size. The experiments were not randomized. Due to the nature  
1159 of experiments, the authors were not blinded to group allocation during data collection and

1160 analysis. Only viable embryos were included in the analysis. Frequencies of shown  
1161 morphological phenotypes and WMISH patterns are included in every image. The significance  
1162 of over-represented GO terms was based on hypergeometric tests. Significances of non-  
1163 normally distributed data points (gene features) across ZGA were calculated using paired  
1164 Wilcoxon rank-sum tests (alternative hypothesis 'less'). The effect size ( $r_{\text{effect}}$ ) was estimated  
1165 from the standard normal deviate of the Wilcoxon p-value ( $p$ ) as previously described  
1166 (Rosenthal, 1991),  $r_{\text{effect}}=Z/\sqrt{N}$ , where  $Z=qnorm(1-p/2)$  is the standardized Z-score and  $N$  is  
1167 the number of observations.

1168

1169 For RNA-Seq, biological triplicates were used to account for transcriptional variability between  
1170 clutches. Each LOF experiment has its own control embryos collected in parallel from the same  
1171 mothers: exp. #1 ( $\alpha$ -amanitin), uninjected embryos; exp. #2 (BMP or Nodal LOF), DMSO-  
1172 treated embryos; exp. #3 (Wnt LOF), uninjected embryos; exp. #4 (mPou5f3/Sox3 LOF),  
1173 uninjected embryos; exp. #5 (mVegT LOF), uninjected embryos; exp. #6 (single and  
1174 combinatorial LOFs of Wnt, Nodal and BMP), DMSO-treated embryos; exp. #7 (combinatorial  
1175 LOF of 4 zygotic T-box TFs), control MO-injected embryos. The gene expressions of control  
1176 MO-injected embryos of exp. #2 and #5 were normalized to their corresponding uninjected  
1177 embryos. The mean of these normalizations and conservative FDR estimations (i.e., higher  
1178 FDR of the two likelihood ratio tests) were used for the comparison with LOF conditions. RNA-  
1179 Seq libraries from each experiment were generated simultaneously to mitigate any batch  
1180 effects. The FDR was controlled for multiple comparisons according to the Benjamini-Hochberg  
1181 procedure. The exact computational implementation of differential expression analysis is  
1182 outlined on GitHub (see below).

1183

#### 1184 **DATA AND SOFTWARE AVAILABILITY**

1185 Sequencing reads (FASTQ files) and raw RNA-Seq read counts reported in this paper are  
1186 available in the GEO database ([www.ncbi.nlm.nih.gov/geo](http://www.ncbi.nlm.nih.gov/geo)) under the accession numbers  
1187 GSE113186 and GSE122551. All analyses were performed in R v3.5.1 (Bioconductor v3.8),  
1188 Perl v5.18.2 (<https://www.perl.org>) and Python v2.7.12 (<http://www.python.org>) as detailed  
1189 above. The R code, genome annotation, intermediate datasets and graphs are available on  
1190 GitHub at <https://github.com/gegentsch/SpatioTemporalControlZGA>. Original datasets are also  
1191 available on Mendeley Data at <http://dx.doi.org/10.17632/jn466b4n8v.1>.

1192

#### 1193 **SUPPLEMENTAL REFERENCES**

1194 Benson, G. (1999). Tandem repeats finder: a program to analyze DNA sequences. *Nucleic*  
1195 *Acids Res.* 27, 573–580.

1196 Blitz, I.L., Paraiso, K.D., Patrushev, I., Chiu, W.T.Y., Cho, K.W.Y., and Gilchrist, M.J. (2017).  
1197 A catalog of *Xenopus tropicalis* transcription factors and their regional expression in the early  
1198 gastrula stage embryo. *Dev. Biol.* 426, 409–417.

1199 Carlson, M., Falcon, S., Pages, H., and Li, N. (2007). Bioconductor - GO.db.



- 1200 Chiu, W.T., Le, R.C., Blitz, I.L., Fish, M.B., Li, Y., Biesinger, J., Xie, X., and Cho, K.W.Y.  
1201 (2014). Genome-wide view of TGF $\beta$ /Foxh1 regulation of the early mesendoderm program.  
1202 *Development* 141, 1–114.
- 1203 Collart, C., Owens, N.D.L., Bhaw-Rosun, L., Cooper, B., De Domenico, E., Patrushev, I.,  
1204 Sesay, A.K., Smith, J.N., Smith, J.C., and Gilchrist, M.J. (2014). High-resolution analysis of  
1205 gene activity during the *Xenopus* mid-blastula transition. *Development* 141, 1927–1939.
- 1206 Conesa, A., Götz, S., García-Gómez, J.M., Terol, J., Talón, M., and Robles, M. (2005).  
1207 Blast2GO: a universal tool for annotation, visualization and analysis in functional genomics  
1208 research. *Bioinformatics* 21, 3674–3676.
- 1209 Dobin, A., Davis, C.A., Schlesinger, F., Drenkow, J., Zaleski, C., Jha, S., Batut, P., Chaisson,  
1210 M., and Gingeras, T.R. (2013). STAR: ultrafast universal RNA-seq aligner. *Bioinformatics* 29,  
1211 15–21.
- 1212 Falcon, S., and Gentleman, R. (2007). Using GOstats to test gene lists for GO term  
1213 association. *Bioinformatics* 23, 257–258.
- 1214 Fukuda, M., Takahashi, S., Haramoto, Y., Onuma, Y., Kim, Y.-J., Yeo, C.-Y., Ishiura, S., and  
1215 Asashima, M. (2010). Zygotic VegT is required for *Xenopus* paraxial mesoderm formation and  
1216 is regulated by Nodal signaling and Eomesodermin. *Int. J. Dev. Biol.* 54, 81–92.
- 1217 Gay, L., Karfilis, K.V., Miller, M.R., Doe, C.Q., and Stankunas, K. (2014). Applying thiouracil  
1218 tagging to mouse transcriptome analysis. *Nat. Protoc.* 9, 410–420.
- 1219 Gentsch, G.E., and Smith, J.C. (2017). Efficient Preparation of High-Complexity ChIP-Seq  
1220 Profiles from Early *Xenopus* Embryos. *Methods Mol. Biol.* 1507, 23–42.
- 1221 Gentsch, G.E., Owens, N.D.L., Martin, S.R., Piccinelli, P., Faial, T., Trotter, M.W.B., Gilchrist,  
1222 M.J., and Smith, J.C. (2013). In vivo T-box transcription factor profiling reveals joint regulation  
1223 of embryonic neuromesodermal bipotency. *Cell Rep.* 4, 1185–1196.
- 1224 Gentsch, G.E., Patrushev, I., and Smith, J.C. (2015). Genome-wide snapshot of chromatin  
1225 regulators and states in *Xenopus* embryos by ChIP-Seq. *J. Vis. Exp.* 96, e52535.
- 1226 Gentsch, G.E., Spruce, T., Monteiro, R.S., Owens, N.D.L., Martin, S.R., and Smith, J.C.  
1227 (2018a). Innate Immune Response and Off-Target Mis-splicing Are Common Morpholino-  
1228 Induced Side Effects in *Xenopus*. *Dev. Cell* 44, 597–610.e10.
- 1229 Gentsch, G.E., Spruce, T., Owens, N.D.L., and Smith, J.C. (2018b). The role of maternal  
1230 pioneer factors in predefining first zygotic responses to inductive signals. bioRxiv 306803.  
1231 DOI: <https://doi.org/10.1101/306803>
- 1232 Gu, Z., Eils, R., and Schlesner, M. (2016a). Complex heatmaps reveal patterns and  
1233 correlations in multidimensional genomic data. *Bioinformatics* 32, 2847–2849.
- 1234 Gu, Z., Eils, R., and Schlesner, M. (2016b). HilbertCurve: an R/Bioconductor package for  
1235 high-resolution visualization of genomic data. *Bioinformatics* 32, 2372–2374.
- 1236 Gu, Z., Gu, L., Eils, R., Schlesner, M., and Brors, B. (2014). circlize Implements and  
1237 enhances circular visualization in R. *Bioinformatics* 30, 2811–2812.
- 1238 Hahsler, M., Hornik, K., and Buchta, C. (2008). Getting Things in Order: An Introduction to the  
1239 R Package seriation. *J. Stat. Softw.* 25, 1–34.
- 1240 Heasman, J., Kofron, M., and Wylie, C. (2000).  $\beta$ Catenin Signaling Activity Dissected in the  
1241 Early *Xenopus* Embryo: A Novel Antisense Approach. *Dev. Biol.* 222, 124–134.

- 1242 Heinz, S., Benner, C., Spann, N., Bertolino, E., Lin, Y.C., Laslo, P., Cheng, J.X., Murre, C.,  
1243 Singh, H., and Glass, C.K. (2010). Simple combinations of lineage-determining transcription  
1244 factors prime cis-regulatory elements required for macrophage and B cell identities. *Mol. Cell*  
1245 *38*, 576–589.
- 1246 Hontelez, S., van Kruijsbergen, I., Georgiou, G., van Heeringen, S.J., Bogdanović, O., Lister,  
1247 R., and Veenstra, G.J.C. (2015). Embryonic transcription is controlled by maternally defined  
1248 chromatin state. *Nat. Commun.* *6*, 10148.
- 1249 Khokha, M., Chung, C., Bustamante, E., Gaw, L., Trott, K., Yeh, J., Lim, N., Lin, J., Taverner,  
1250 N., Amaya, E., et al. (2002). Techniques and probes for the study of *Xenopus tropicalis*  
1251 development. *Dev. Dyn.* *225*, 499–510.
- 1252 Langmead, B., and Salzberg, S.L. (2012). Fast gapped-read alignment with Bowtie 2. *Nat.*  
1253 *Methods* *9*, 357–359.
- 1254 Lawrence, M., Gentleman, R., and Carey, V. (2009). rtracklayer: an R package for interfacing  
1255 with genome browsers. *Bioinformatics* *25*, 1841-1842.
- 1256 Lawrence, M., Huber, W., Pagès, H., Aboyoun, P., Carlson, M., Gentleman, R., Morgan, M.,  
1257 and Carey, V. (2013). Software for Computing and Annotating Genomic Ranges. *PLoS*  
1258 *Comput. Biol.* *9*, e1003118.
- 1259 Li, H., Handsaker, B., Wysoker, A., Fennell, T., Ruan, J., Homer, N., Marth, G., Abecasis, G.,  
1260 Durbin, R., 1000 Genome Project Data Processing Subgroup (2009). The Sequence  
1261 Alignment/Map format and SAMtools. *Bioinformatics* *25*, 2078–2079.
- 1262 Love, M.I., Huber, W., and Anders, S. (2014). Moderated estimation of fold change and  
1263 dispersion for RNA-seq data with DESeq2. *Genome Biol.* *15*, 550.
- 1264 Monsoro-Burq, A.H. (2007). A Rapid Protocol for Whole-Mount In Situ Hybridization on  
1265 *Xenopus* Embryos. *Cold Spring Harb. Protoc.* *2007*, pdb.prot4809.
- 1266 Morgan, M., Falcon, S., and Gentleman, R. (2017). *GSEABase: Gene set enrichment data*  
1267 *structures and methods*.
- 1268 Nakamura, Y., de Paiva Alves, E., Veenstra, G.J.C., and Hoppler, S. (2016). Tissue- and  
1269 stage-specific Wnt target gene expression is controlled subsequent to  $\beta$ -catenin recruitment  
1270 to cis-regulatory modules. *Development* *143*, 1914–1925.
- 1271 Nieuwkoop, P., and Faber, J. (1994). Normal table of *Xenopus laevis* (Daudin): a systematical  
1272 and chronological survey of the development from the fertilized egg till the end of  
1273 metamorphosis. Garland.
- 1274 Owens, N.D.L., Blitz, I.L., Lane, M.A., Patrushev, I., Overton, J.D., Gilchrist, M.J., Cho,  
1275 K.W.Y., and Khokha, M.K. (2016). Measuring Absolute RNA Copy Numbers at High Temporal  
1276 Resolution Reveals Transcriptome Kinetics in Development. *Cell Rep.* *14*, 632–647.
- 1277 Pertea, M., Kim, D., Pertea, G.M., Leek, J.T., and Salzberg, S.L. (2016). Transcript-level  
1278 expression analysis of RNA-seq experiments with HISAT, StringTie and Ballgown. *Nat.*  
1279 *Protoc.* *11*, 1650–1667.
- 1280 Quinlan, A.R., and Hall, I.M. (2010). BEDTools: a flexible suite of utilities for comparing  
1281 genomic features. *Bioinformatics* *26*, 841–842.
- 1282 Rana, A., Collart, C., Gilchrist, M., and Smith, J. (2006). Defining synphenotype groups in  
1283 *Xenopus tropicalis* by use of antisense morpholino oligonucleotides. *PLoS Genet.* *2*, e193.
- 1284 Ritchie, M.E., Phipson, B., Wu, D., Hu, Y., Law, C.W., Shi, W., and Smyth, G.K. (2015). limma  
1285 powers differential expression analyses for RNA-sequencing and microarray studies. *Nucleic*

- 1286 Acids Res. 43, e47.
- 1287 Robinson, J.T., Thorvaldsdóttir, H., Winckler, W., Guttman, M., Lander, E.S., Getz, G., and  
1288 Mesirov, J.P. (2011). Integrative genomics viewer. *Nat. Biotechnol.* 29, 24–26.
- 1289 Rosenthal, R. (1991). *Meta-Analytic Procedures for Social Research*. SAGE Publishing.
- 1290 Sive, H., Grainger, R., and Harland, R. (2000). *Early development of Xenopus laevis: A  
1291 laboratory manual*. Cold Spring Harbor Laboratory Press.
- 1292 Smit, A., Hubley, R., and Green, P. RepeatMasker Open-4.0. 2013-2015.
- 1293 Smith, J., Price, B., Green, J., Weigel, D., and Herrmann, B. (1991). Expression of a Xenopus  
1294 homolog of Brachyury (T) is an immediate-early response to mesoderm induction. *Cell* 67,  
1295 79–87.
- 1296 Wang, L., Wang, S., and Li, W. (2012). RSeQC: quality control of RNA-seq experiments.  
1297 *Bioinformatics* 28, 2184–2185.
- 1298 Wickham, H. (2016). *ggplot2: Elegant Graphics for Data Analysis*. Springer.
- 1299 Yoon, S.-J., Wills, A.E., Chuong, E., Gupta, R., and Baker, J.C. (2011). HEB and E2A  
1300 function as SMAD/FOXH1 cofactors. *Genes Dev.* 25, 1654–1661.
- 1301 Zhu, Q., Fisher, S.A., Shallcross, J., and Kim, J. (2016). VERSE: a versatile and efficient RNA-  
1302 Seq read counting tool. bioRxiv 053306. DOI: <https://doi.org/10.1101/053306>
